1 **The antibody response to SARS-CoV-2 infection persists over at least 8 months in**  
2 **symptomatic patients**

3  
4 Riccardo Levi<sup>1,2\*</sup>, Leonardo Ubaldi<sup>1,2\*</sup>, Chiara Pozzi<sup>2</sup>, Giovanni Angelotti<sup>2</sup>, Maria Teresa Sandri<sup>1,2</sup>,  
5 Elena Azzolini<sup>1,2</sup>, Michela Salvatici<sup>2</sup>, Victor Savevski<sup>2</sup>, Alberto Mantovani<sup>1,2,3</sup> and Maria  
6 Rescigno<sup>1,2,#</sup>

7  
8 <sup>1</sup>Humanitas University, Department of Biomedical Sciences, Via Rita Levi Montalcini, 20072 Pieve  
9 Emanuele, MI, Italy.

10 <sup>2</sup>IRCCS Humanitas Clinical and Research Center, Via Manzoni 56, 20089 Rozzano, MI, Italy.

11 <sup>3</sup>The William Harvey Research Institute, Queen Mary University of London, London, UK

12  
13 \*These authors contributed equally to the work

14  
15  
16 #Corresponding author

17 E-mail: [maria.rescigno@hunimed.eu](mailto:maria.rescigno@hunimed.eu)

18 Humanitas University

19 Via Rita Levi Montalcini, 4

20 20072 Pieve Emanuele (MI) Italy

29 **Abstract**

30

31 The factors involved in the persistence of antibodies to SARS-CoV-2 are unknown. We evaluated  
32 the antibody response to SARS-CoV-2 in personnel from 10 healthcare facilities and its association  
33 with individuals' characteristics and COVID-19 symptoms in an observational study. We enrolled  
34 4735 subjects (corresponding to 80% of all personnel) for three time points over a period of 8-10  
35 months. For each participant, we determined the rate of antibody increase or decrease over time in  
36 relation to 93 features analyzed in univariate and multivariate analyses through a machine learning  
37 approach. In individuals positive for IgG ( $\geq 12$  AU/mL) at the beginning of the study, we found an  
38 increase [ $p= 0.0002$ ] in antibody response in symptomatic subjects, particularly with  
39 anosmia/dysgeusia (OR 2.75, 95% CI 1.753 – 4.301), in a multivariate logistic regression analysis.  
40 This may be linked to the lingering of SARS-CoV-2 in the olfactory bulb.

41

42

## 43 **Introduction**

44 It is becoming clear that the antibody response to SARS-CoV-2 can last at least 6 months in  
45 symptomatic patients <sup>1</sup>, but it seems to decline in asymptomatics <sup>2</sup>. Similarly, a reduction of  
46 antibody response in asymptomatic individuals was shown in a study with a fewer number of  
47 individuals (n = 37) <sup>3</sup>. The antibody response in COVID-19 patients is associated with the  
48 establishment of a memory B cell response which is higher at 6 months <sup>1</sup>, however, it is not clear  
49 whether there are features that correlate with this sustained B cell response. We previously showed  
50 that an anti-SARS-CoV-2 serological analysis allowed us to follow the diffusion of the virus within  
51 healthcare facilities in areas differently hit by the virus <sup>4</sup>. At 8-10 months of distance, we analyzed  
52 the duration of this antibody response and evaluated whether there were features correlating with  
53 maintenance, reduction or increase of the antibody response.

54

## 55 **Results**

56 We analyzed the persistence of the antibody response in healthcare workers that underwent  
57 immunological surveillance for SARS-CoV-2 exposure and resulted positive for anti-Spike 1/2 IgG  
58 (IgG  $\geq$  12 AU/mL). Although the test manufacturer considers positive subjects above 15 AU/mL  
59 and equivocal those between 12 and 15 (AU/mL), based on our previous publication showing that  
60 these two groups behaved very similarly we considered positive everybody  $\geq$  12 AU/mL<sup>4</sup>. The  
61 accrual was on a voluntary basis and did not occur in the symptomatic phase (at around 43 +/- 17  
62 days from COVID-19 assessment when symptomatic). We excluded all of the individuals that  
63 became positive over the course of the analysis so to focus only on those individuals that were  
64 exposed during the first wave of infection to evaluate the duration of the antibody response. We  
65 assessed the correlation of the rate of antibody increase or decrease with the different analyzed  
66 features for the first two time points of observation in subjects with IgG  $\geq$  12 AU/mL. In Tables 1  
67 and 2 are reported the rates for individual classes of features with relative statistical analysis. As  
68 shown, females sustained the antibody response better than males ( $p = 0.01$ ); similarly non-medical  
69 healthcare professionals (specifically, healthcare partner operators) had higher antibody rates ( $p =$   
70  $0.0009$ ). The levels of antibodies increased in hospitals located in the Bergamo area (Castelli and  
71 Gavazzeni  $p < 0.0001$ ) (Table 1) which was more hit by COVID-19 (37 – 43% of individuals with  
72 IgG  $\geq$  12) <sup>4</sup>. More important, the IgG rate in individuals which were positive for IgG (IgG  $\geq$  12  
73 AU/mL; n = 613) at the beginning of the study was increased ( $p < 0.000001$ ) over time, and this  
74 increase was either minor in asymptomatics (n = 91,  $p = 0.00003$ ) and paucisymptomatics (n = 203)  
75 or strong in symptomatics (n = 319,  $p = 0.0006$ ) (Table 2). This may explain why individuals from  
76 hospitals in the Bergamo area or non-medical healthcare professionals had higher levels of

77 antibodies as most of them suffered from symptomatic COVID-19 (59% and 73%, respectively).  
78 On the contrary, those that had an intermediate IgG titer ( $3.8 < \text{IgG} < 12$  AU/mL considered as  
79 negative) displayed all a significant reduction in IgG rate ( $p < 0.000001$ ) (Table 1). However, this  
80 population is considered as negative for SARS-CoV-2 IgG according to manufacturer. Many  
81 symptoms, including fever, cough, muscle pain, asthenia, tachycardia and anosmia/dysgeusia,  
82 correlated with an increase of antibodies in the first two time points of observation (Table 2).  
83 As we noticed that the distribution of the rate feature presented a high value of kurtosis (see  
84 methods) we restricted the data set to subjects with IgG rates either below the 10<sup>th</sup> percentile [ $< -$   
85  $0.033$  ( $n = 454$ )] or above the 90<sup>th</sup> percentile [ $> 0.005$  ( $n = 445$ )] to prevent a bias-variance problem  
86 in machine learning models. The accuracy of these rates was confirmed by a linear regression  
87 analysis. In Figure 1a and 1b are shown the regression diagnostic plots of predicted values against  
88 residuals of training and test data according to the threshold ( $< -0.033$  AU/ml\*day and  $> 0.005$   
89 AU/ml\*day). In Table 3 is shown the Chi-squared analysis for the populations below or above the  
90 set threshold rates. We found that as for the previous analysis, males reduced the level of antibodies  
91 more than females, even though this difference was no longer statistically significant ( $p = 0.06$ ).  
92 The levels of antibodies increased in hospitals located in the Bergamo area (Castelli and Gavazzeni:  
93  $p = 0.0032$  and  $p = 0.0005$ , respectively) which was more hit by COVID-19 (37 – 43% of  
94 individuals with  $\text{IgG} \geq 12$ ) and most of the individuals were symptomatic <sup>4</sup> while it decreased in  
95 Humanitas Rozzano ( $p=0.0806$ ) which was less heavily hit (10% of individuals with  $\text{IgG} \geq 12$ ) and  
96 had less symptomatic individuals <sup>4</sup> (Table 3). The rate decreased in asymptomatic (65% of subjects  
97 fell in the group  $< -0.033$ ;  $p < 0.000001$ ), remained constant in paucisymptomatic and increased in  
98 symptomatic individuals (62% of subjects were in the group  $> 0.005$ ;  $p < 0.000001$ ) (Table 4).  
99 Interestingly, among the different symptoms, fever, cough, muscle pain, asthenia, dyspnea,  
100 tachycardia, chest pain and anosmia/dysgeusia all correlated with a higher number of individuals  
101 falling into the group with rate  $> 0.005$ , indicating that these symptoms were strongly associated  
102 with sustained/increased antibody response ( $0.000001 < p < 0.05$ , Table 4 and Suppl. Fig. 1).  
103 Among these, anosmia/dysgeusia was associated with the highest percentage of subjects presenting  
104 with increased IgG rate (69%;  $p < 0.000001$ , Table 4 and Suppl. Fig. 1). Having observed  
105 differences according to sex, role and site, and since many symptoms are linked, we performed a  
106 multivariate statistical analysis based on a supervised machine learning classification approach (see  
107 methods). Through a Bayesian hyperparameter optimization algorithm, we assessed that the best  
108 machine learning model is a Bagging classifier of 7 logistic regression, which was evaluated both  
109 on a training (Accuracy = 76.26; ROC AUC = 76.30; Recall = 81.14) and a test dataset (Accuracy =  
110 72.00; ROC AUC = 72.12; Recall = 81.08), where the training/test split is 80%-20%, stratified by

111 outcome. Classification metrics on training set and test set are comparable, which shows that the  
112 model does not present overfitting on training data. In Figure 1c is shown the multivariate logistic  
113 regression analysis. We found that the increased rate was associated primarily with  
114 anosmia/dysgeusia (regression coefficient=1.0, 95% CI 0.56 – 1.46) and with chest pain (regression  
115 coefficient=0.84, 95% CI 0.24 – 1.44), while the decreased rate was associated to subjects with  
116 intermediate IgG ( $3.8 < \text{IgG} < 12$ ) (regression coefficient = -1.61, 95% CI -2.03 – -1.0), which may  
117 be related to a noise in the instrument testing, and with past neoplasia (regression coefficient = -  
118 1.38, 95% CI -2.4 – -0.37). Interestingly, 54% of subjects with chest pain also presented loss of  
119 smell/taste while only 22% of subjects with smell/taste dysfunction also had chest pain, suggesting  
120 that IgG increase in the symptomatic population is primarily linked to anosmia and dysgeusia (not  
121 shown). In figure 1d are shown the odds ratio relative to figure 1c, which for chest pain is 2.32  
122 (95% CI 1.27 – 4.24), for anosmia/dysgeusia is 2.75 (95% CI 1.75 – 4.30), for subjects with  
123 intermediate IgG ( $3.8 < \text{IgG} < 12$ ) is 0.2 (95% CI 0.13 – 0.30) and for subjects with past neoplasia  
124 is 0.25 (95% CI 0.09 – 0.69). Overall, these results indicate that although many symptoms are  
125 associated with an increase of IgG abundance in the observation time, only anosmia/dysgeusia and  
126 chest pain are associated to a higher IgG rate in the multivariate logistic regression analysis. By  
127 contrast the population with past neoplasia or intermediate levels of IgG ( $3.8 < \text{IgG} < 12$  AU/mL)  
128 are the ones that display a reduction in IgG. However, the significance of the reduction in the  
129 detection of antibodies in subjects with intermediate levels of IgG remains to be investigated, as this  
130 population did not represent early infected individuals because they were all nasopharyngeal swab  
131 negative <sup>4</sup>.

132 We then analyzed whether the antibody response was maintained over time in the third time point  
133 of analysis (n = 499) which was evaluated between November and December 2020 thus reaching an  
134 observation of 8-10 months. As shown in Figure 2 and Suppl. Fig. 2 we observed that both  
135 symptomatic and paucisymptomatic individuals still displayed a higher level of antibodies, however  
136 they did not increase between phase 2 and phase 3. By contrast, asymptomatic individuals did not  
137 increase their IgG levels over time.

138

## 139 **Discussion**

140 We analyzed the 8-10-month duration of an antibody response to SARS-CoV-2 in personnel from 9  
141 healthcare facilities and an international medical school (Humanitas University) in Northern Italy in  
142 areas differently hit by the virus <sup>4</sup>. We show that the antibody response is stable both in  
143 symptomatic and asymptomatic/paucisymptomatic individuals and is increased in females and in  
144 non-medical healthcare professionals. Previously, it has been shown in a study conducted in the

145 British population that the antibody response declines of nearly 22% in symptomatic individuals  
146 and of 64% in asymptomatic individuals<sup>2</sup>. However, this study was based on a prick qualitative test  
147 and thus the decline may be related to the sensitivity of the test. We also observed that the antibody  
148 response declined when we analyzed the group ( $3.8 < \text{IgG} < 12 \text{ AU/mL}$ ) with IgG between the limit  
149 of detection ( $3.8 \text{ AU/mL}$ ) and the threshold of positivity ( $\text{IgG} \geq 12 \text{ AU/mL}$ ), as set by  
150 manufacturer. Whether this is linked to a difference linked to the sensitivity of the test or to a real  
151 reduction in an antibody response that may or may not be specific to SARS-CoV-2, remains to be  
152 established. In a previous analysis we excluded that this population represented individuals in the  
153 initial phases of an infection as all of them were tested for SARS-CoV-2 by a nasopharyngeal swab  
154 which however resulted negative<sup>4</sup>. When we analyzed the extremes, i.e. the individuals with higher  
155 rates of antibody increase or decrease ( $< -0.033$  and  $> 0.005 \text{ AU/mL*day}$ ) we observed that  
156 asymptomatics had higher negative rates while symptomatics tended to continue increasing the  
157 antibody levels suggesting that extreme changes in rate separate the symptomatics from the  
158 asymptomatics. As during the observation time there was very limited viral diffusion in Northern  
159 Italy, as confirmed also by the finding that only 2 individuals became IgG positive and 2981  
160 remained IgG negative throughout the study (all excluded from the analysis), we can conclude that  
161 the sustained or augmented antibody response may not be linked to a re-exposure to the virus. In an  
162 attempt to address what improved the antibody response, we found that several symptoms were  
163 associated to increased rates of antibodies, however, in a multivariate logistic analysis only  
164 anosmia/dysgeusia and chest pain were linked with the highest regression coefficients. Chest pain  
165 and anosmia are long-lasting symptoms in COVID-19 patients<sup>5</sup>. In addition, anosmia and/or  
166 dysgeusia are very common as they are found in around 50-70% of subjects affected by COVID-19  
167<sup>6,7</sup>. In our cohort (Table 2), 49% of IgG positive subjects had anosmia/dysgeusia, 28% chest pain  
168 and 13.7% both anosmia/dysgeusia and chest pain, suggesting that indeed these two symptoms  
169 may, either alone or in combination, associate with IgG increase. We and others previously found  
170 that anosmia/dysgeusia together with fever were the symptoms that mostly characterized SARS-  
171 CoV-2 exposure<sup>4,8</sup>. In agreement, anosmia and dysgeusia have been proposed to be used to track  
172 SARS-CoV-2 diffusion<sup>9</sup>. Interestingly, SARS-CoV-2 can infect the olfactory epithelium<sup>10,11</sup>,  
173 including olfactory sensory neurons, support cells and immune cells, that express the viral entry  
174 receptors ACE2 and TMPRSS2<sup>10,12,13</sup>. Here, the virus can persist long and induce local  
175 inflammation<sup>11</sup> and olfactory bulb abnormalities<sup>14,15,16</sup>. In agreement, the loss of smell and taste  
176 can persist in individuals even with RT-PCR SARS-CoV-2 negativity in the nasopharyngeal swab  
177 for months<sup>11,17</sup>. Supporting this possibility, we did not detect any further increase of IgG levels

178 between phase 2 and phase 3 suggesting that when individuals eliminate the virus then there is no  
179 further increase of the antibody response.

180 One limitation of our study is that we followed our healthcare workers for the exposure to SARS-  
181 CoV-2 via measuring the anti S1/S2 IgG response and have not evaluated any other antibody  
182 subtype nor their neutralizing activity, even though the test used has correlated the antibody levels  
183 with their neutralizing activity, as reported in the methods section.

184 Overall, these data suggest that increased antibody response in patients with anosmia/dysgeusia  
185 may be linked to persistence of the virus in the olfactory bulb which through local inflammation  
186 and release of antigens, maintains and boosts the antibody response. This study opens new  
187 perspectives on the immunity to SARS-CoV-2 and warrants further investigation on the role of  
188 anosmia/dysgeusia on antibody response through the design of prospective observational studies  
189 coupling the testing of SARS-CoV-2 persistence in the olfactory bulb, loss of smell or taste and  
190 antibody titers. In addition, we show that the antibody response to the natural infection is durable  
191 and persists for at least 8 months. If the antibody response elicited by the vaccines is similarly  
192 effective, we may expect it to last for at least the same amount of time. Further, this observation  
193 strongly supports our findings and those of others that convalescent symptomatic COVID-19  
194 patients should receive only one dose of vaccine<sup>18, 19, 20, 21</sup> and suggests that this may occur even at  
195 months of distance from developing the disease as their antibody response will just need to be  
196 boosted.

197

## 198 **Methods**

### 199 Study population

200 This observational study has been approved by the international review board of Istituto Clinico  
201 Humanitas for all participating institutes (clinicaltrials.gov NCT04387929). Accrual was on a  
202 voluntary basis: it started on April 28<sup>th</sup> and more than 80% of personnel participated (n = 4735).  
203 The study foresees 4 blood collections every 3/4 months. 10 different centers participate: Istituto  
204 Clinico Humanitas (ICH), Rozzano (MI); Humanitas Gavazzeni, Bergamo; Humanitas Castelli,  
205 Bergamo; Humanitas Mater Domini (HMD), Castellanza (VA); Humanitas Medical Center, HMC,  
206 Varese; Humanitas University, Pieve Emanuele (MI); Humanitas San Pio X, Milano; Humanitas  
207 Cellini, Torino; Humanitas Gradenigo, Torino; Clinica Fornaca, Torino. All participants signed an  
208 informed consent and filled a questionnaire before blood collection. We analyzed 93 features (72  
209 categorical and 17 numerical and 4 temporal) including, age, sex, location, professional role, time  
210 between sample collections, COVID-19 symptoms (fever, sore throat, cough, muscle pain, asthenia,  
211 anosmia/dysgeusia (loss of smell and taste), gastrointestinal symptoms, conjunctivitis, dyspnea,

212 chest pain, tachycardia, pneumonia), home exits and smart-working, comorbidities (diabetes,  
213 asthma, neoplasia, autoimmunity, cardiovascular disorders, hepatic disorders). We considered  
214 “asymptomatics” subjects without any symptoms; “paucisymptomatics” individuals that developed  
215 1 or 2 symptoms; “symptomatics” individuals with more than 3 symptoms. None of the participants  
216 were enrolled at the time of symptoms. Thus, when the serological test was performed, they were  
217 either asymptomatics or the symptoms had disappeared. After excluding for employees that became  
218 positive for SARS-CoV-2 IgG (n = 2) during the observation period and those that dropped from  
219 phase 1 or for which we were missing at least two features, we analyzed 4534 participants (4.25%  
220 drop out). Here we show the results of the end of phase 2 and phase 3 (second and third blood  
221 sampling).

222

### 223 IgG measure

224 For the determination of IgG anti SARS-CoV-2, the Liaison SARS-CoV-2 S1/S2 IgG assay  
225 (DiaSorin, Saluggia (VC), Italy) was used <sup>22</sup>. The method is an indirect chemiluminescence  
226 immunoassay for the determination of anti-S1 and anti-S2 specific antibodies. According to kit  
227 manufacturer, the test discriminates among negative (< 15 AU/mL; with 3.8 as the limit of IgG  
228 detection) and positive ( $\geq$  15 AU/mL) subjects. We considered positive subjects with IgG plasma  
229 levels  $\geq$  12 AU/mL rather than those with IgG  $\geq$  15 AU/mL, as suggested by the test manufacturer,  
230 based on our previous publication showing that these two groups behaved very similarly <sup>4</sup>. In  
231 addition, we considered also individuals with IgG comprised between 3.8 and 12 AU/mL (which  
232 we called IgG med:  $3.8 < \text{IgG} < 12$  AU/mL). Consistency and reproducibility of the antibody test in  
233 samples collected in the two time points was confirmed for a limited number of individuals (n = 50)  
234 displaying different degrees of IgG positivity. The LIAISON assay's performance in comparison to  
235 a microneutralization assay is shown in Bonelli et al. <sup>22</sup>. The LIAISON serological S1/S2 assay can  
236 distinguish between neutralization positive and negative samples at cut-offs near 15 AU/mL, and  
237 additionally the data indicate that 92% of the samples with >80 AU/mL had neutralization  
238 titers  $\geq$ 1:80, while 87% of samples with >80 AU/mL had neutralization titers  $\geq$ 1:160.

239 As the samples were analyzed in separate batches, we compared the test accuracy on 21 samples  
240 from the phase 1 with the detection kits of phase 1 and phase 2 and demonstrated that the tested IgG  
241 were almost over-imposable (Suppl. Fig. 3).

242

### 243 Statistical analysis and model



244 We first cleared the dataset by eliminating data from all of those subjects that did not develop an  
245 IgG response over time ( $IgG \leq 3.8$  at the beginning and at the end of the examination) ( $n = 2981$ ).  
246 We then analyzed the rate of antibody response defined as:

247

$$248 \quad RATE = IgG \text{ phase II} - IgG \text{ phase I} = [AU / mL * day]$$
$$249 \quad \Delta days$$

250

251 Positive rates mean increased antibody response, while negative rates indicate reduction of antibody  
252 response between the two analyzed time points.

253 For statistical analysis, we performed both a univariate and a multivariate analysis. We applied  
254 Wilcoxon-Mann-Whitney statistical non-parametric test to compare the antibody rate distribution  
255 between classes of subjects (Table 1 and Table 2).

256 We analyzed the distribution of the rate feature and found a high value of kurtosis (461) around the  
257 median value of 0.016, hence to perform a multivariate analysis we restricted the data set to  
258 subjects with IgG rates either below the 10<sup>th</sup> percentile or above the 90<sup>th</sup> percentile to prevent a  
259 bias-variance problem in machine learning models and subjected the data to a linear regression  
260 analysis between the training and test data sets, where the target variable (rate of antibodies) was  
261 standardized using the Yeo-Johnson method <sup>23</sup>. We then applied Chi-squared statistical test to  
262 evaluate differences between classes and the rate thresholds described above (Tables 3 and 4). In  
263 order to evaluate the possible interactions between features and the rate of antibody response, we  
264 developed a multivariate approach to perform a binary classification between subjects who  
265 increased or decreased the level of antibodies. A set of 7 logistic regressions has been applied on  
266 data using a bootstrap procedure (samples are drawn with replacement) and the output of each  
267 classifier has been averaged by a Bagging classifier to obtain the final output. The selection of  
268 hyperparameters of the machine learning model and the feature selection has been performed with a  
269 Bayesian optimization approach based on cross validation (4 folds, stratified by outcome). The  
270 comparisons shown in Figure 2 and Suppl. Fig. 2 were carried out using one-tailed Wilcoxon  
271 matched-pairs signed rank test. A probability value of  $P < 0.05$  was considered significant. Data  
272 analyses were carried out using GraphPad Prism version 8 and Python version 3.8 with the  
273 following libraries: Pandas (version 1.1.4, data wrangling), Scipy (version 1.3.2, statistical  
274 analysis), Scikit-Learn (version 0.24.1, LR statistical model).

275

276 **Data and code availability**

277 Humanitas metadata are deposited in Institutional Zenodo community named IRCCS Humanitas  
278 Research Hospital & Humanitas University. The dataset and the code are available at the link  
279 <https://zenodo.org/record/4528974#.YCONKXnSJaQ> with restricted license however available  
280 upon request.

281

## 282 **References**

## 283 **Acknowledgments**

284 This work was partially supported by a philanthropic donation by Dolce & Gabbana, by the Italian  
285 Ministry of Health (Ricerca corrente) and by Fondazione Humanitas per la Ricerca.

286 We would like to thank all the employees that volunteered to participate to this study, all the nurses  
287 and personnel that collected the samples and the laboratory technicians that run the serological and  
288 rinopharyngeal tests. We would also like to thank the Humanitas management and staff, Drs  
289 Patrizia Meroni, Michele Lagioia and Michele Tedeschi, who warmly supported this study for the  
290 safety of the employees.

291

## 292 **Author contribution**

293 R.L. and L.U.: performed data analysis; C.P.: contributed to data analysis and manuscript writing;  
294 G.A. and V.S.: contributed to data analysis; M.T.S.: coordinated and supervised the laboratory  
295 analyses; E.A.: coordinated the recruitment and sampling of subjects (project administration) and  
296 participated in clinical study design; M.S.: carried out the laboratory analyses; A.M.:  
297 conceptualization and funding acquisition; M.R.: conceived the study, analyzed the data and wrote  
298 the manuscript.

299

## 300 **Competing interests**

301 The authors declare no competing interests.

302

303

304 **Tables**

305 Table 1. Demographic distribution of antibody rates.

|                      |                             | counts | min   | 25 perc | 50 perc | 75 perc | max   | mean  | St.Dev. | p_value <sup>a</sup> |
|----------------------|-----------------------------|--------|-------|---------|---------|---------|-------|-------|---------|----------------------|
| Sex                  | F                           | 1105   | -3.39 | -0.04   | -0.02   | 0.02    | 16.32 | 0.07  | 0.61    | 0.0139               |
|                      | M                           | 448    | -0.88 | -0.04   | -0.02   | 0       | 10.37 | 0.03  | 0.53    |                      |
| Age                  | 21-30                       | 300    | -3.39 | -0.04   | -0.02   | 0.01    | 4.51  | 0.03  | 0.41    | 0.2644               |
|                      | 31-40                       | 365    | -0.92 | -0.04   | -0.02   | 0.01    | 2.26  | 0.02  | 0.21    | 0.2302               |
|                      | 41-50                       | 455    | -2.49 | -0.04   | -0.02   | 0.03    | 3.11  | 0.06  | 0.37    | 0.1083               |
|                      | 51-60                       | 309    | -0.88 | -0.04   | -0.01   | 0.02    | 16.32 | 0.1   | 0.96    | 0.1442               |
|                      | 60+                         | 124    | -0.68 | -0.04   | -0.02   | -0.01   | 10.37 | 0.12  | 0.99    | 0.0586               |
| BMI <sup>b</sup>     | 18.5 ≤ BMI < 25             | 940    | -0.92 | -0.04   | -0.02   | 0.01    | 10.37 | 0.03  | 0.41    | 0.3821               |
|                      | BMI ≥ 30                    | 106    | -3.39 | -0.05   | -0.02   | 0.14    | 16.32 | 0.23  | 1.69    | 0.2182               |
|                      | 25 ≤ BMI < 30               | 347    | -0.57 | -0.04   | -0.02   | 0.01    | 3.11  | 0.05  | 0.29    | 0.3933               |
|                      | BMI < 18.5                  | 73     | -0.22 | -0.04   | -0.02   | 0.02    | 1.27  | 0.05  | 0.26    | 0.3959               |
| IgG class phase 1    | IgG ≥ 12                    | 613    | -3.39 | -0.08   | 0.02    | 0.23    | 16.32 | 0.18  | 0.92    | 2.1 E-10             |
|                      | IgG ≤ 3.8                   | 74     | 0.01  | 0.01    | 0.02    | 0.03    | 0.08  | 0.02  | 0.01    | 1.5 E-15             |
|                      | 3.8 < IgG < 12              | 866    | -0.13 | -0.03   | -0.02   | -0.01   | 0.83  | -0.02 | 0.04    | 8.0 E-22             |
| Role                 | Other <sup>c</sup>          | 200    | -0.57 | -0.04   | -0.02   | -0.01   | 16.32 | 0.09  | 1.17    | 0.0116               |
|                      | Anesthesiologist            | 19     | -0.83 | -0.04   | -0.02   | 0.01    | 0.09  | -0.05 | 0.2     | 0.4305 <sup>b</sup>  |
|                      | Biologist                   | 18     | -0.18 | -0.05   | -0.02   | -0.02   | 0.03  | -0.04 | 0.05    | 0.0978 <sup>b</sup>  |
|                      | Surgeon                     | 67     | -0.88 | -0.05   | -0.02   | 0.07    | 0.61  | 0.02  | 0.21    | 0.2653               |
|                      | Physiotherapist             | 21     | -0.12 | -0.04   | -0.02   | 0.01    | 0.35  | 0.01  | 0.1     | 0.4204               |
|                      | Nurse                       | 398    | -3.39 | -0.04   | -0.02   | 0.04    | 3.11  | 0.08  | 0.41    | 0.0581               |
|                      | Physician                   | 210    | -0.92 | -0.04   | -0.01   | 0.02    | 10.37 | 0.08  | 0.75    | 0.0804               |
|                      | Healthcare Partner Operator | 149    | -2.49 | -0.03   | -0.01   | 0.17    | 1.55  | 0.1   | 0.38    | 0.0009               |
|                      | Front office (PARC)         | 108    | -0.32 | -0.04   | -0.02   | 0.01    | 2.55  | 0.03  | 0.27    | 0.2892               |
|                      | Researcher                  | 50     | -1.5  | -0.03   | -0.02   | -0.01   | 4.51  | 0.06  | 0.68    | 0.1514               |
|                      | Cleaning service            | 29     | -0.65 | -0.03   | -0.02   | 0.03    | 1.72  | 0.09  | 0.41    | 0.2414               |
|                      | Transport service           | 14     | -0.39 | -0.04   | -0.01   | 0.02    | 2.22  | 0.13  | 0.62    | 0.4359 <sup>b</sup>  |
|                      | Staff                       | 188    | -0.4  | -0.04   | -0.02   | -0.01   | 0.98  | 0     | 0.15    | 0.0026               |
|                      | Student                     | 20     | -0.19 | -0.03   | -0.02   | -0.01   | 0.21  | -0.02 | 0.08    | 0.3705 <sup>b</sup>  |
|                      | Laboratory technician       | 31     | -0.17 | -0.03   | -0.01   | -0.01   | 0.51  | 0.02  | 0.15    | 0.3243               |
|                      | Radiology technician        | 31     | -0.18 | -0.03   | -0.02   | 0.01    | 1.01  | 0.04  | 0.22    | 0.4002               |
| Site                 | Other <sup>c</sup>          | 21     | -0.19 | -0.04   | -0.02   | -0.01   | 2.22  | 0.08  | 0.49    | 0.2080               |
|                      | Casa di Cura Cellini        | 51     | -0.17 | -0.05   | -0.03   | -0.01   | 1.27  | 0.01  | 0.22    | 0.0111               |
|                      | Clinica Fornaca di Sessant  | 47     | -0.4  | -0.05   | -0.03   | 0       | 0.53  | 0     | 0.15    | 0.0833               |
|                      | Humanitas Castelli          | 87     | -0.28 | -0.04   | 0.02    | 0.21    | 3.11  | 0.24  | 0.62    | 4.7 E-05             |
|                      | Humanitas Gavazzeni         | 313    | -0.88 | -0.04   | -0.01   | 0.15    | 10.37 | 0.13  | 0.68    | 0.0001               |
|                      | Humanitas Gradenigo         | 109    | -2.49 | -0.04   | -0.02   | -0.01   | 0.67  | -0.01 | 0.27    | 0.0586               |
|                      | Humanitas Mater Domini      | 105    | -0.17 | -0.03   | -0.02   | -0.01   | 0.63  | 0     | 0.1     | 0.3412               |
|                      | Humanitas Medical Care      | 23     | -0.19 | -0.04   | -0.02   | -0.01   | 0.02  | -0.03 | 0.04    | 0.0969               |
|                      | Humanitas Rozzano           | 667    | -3.39 | -0.04   | -0.02   | 0       | 16.32 | 0.04  | 0.7     | 0.0338               |
|                      | Humanitas San Pio X         | 98     | -0.68 | -0.03   | -0.02   | 0       | 2.39  | 0.04  | 0.29    | 0.2968               |
| Humanitas University | 32                          | -0.2   | -0.04 | -0.02   | -0.01   | 0.19    | -0.03 | 0.08  | 0.0590  |                      |

<sup>a</sup> = Wilcoxon-Mann-Whitney test  
<sup>b</sup> = Some subjects did not indicate their BMI  
<sup>c</sup> = Refers to volunteers and other professionals that operate in several structures  
<sup>d</sup> = Minority class is less or equal to 20 (Wilcoxon-Mann-Whitney test is not reliable)

306  
307  
308  
309

310 Table 2. Antibody rates according to symptoms.

311

|                                                 |                           | counts | min   | 25 perc | 50 perc | 75 perc | max   | mean  | St. Dev. | p_value <sup>a</sup> |         |
|-------------------------------------------------|---------------------------|--------|-------|---------|---------|---------|-------|-------|----------|----------------------|---------|
| Class symptoms phase 1 (subjects with IgG ≥ 12) | Asymptomatic              | 91     | -1.5  | -0.13   | -0.05   | 0.09    | 2.39  | 0.04  | 0.5      | 0.00003              |         |
|                                                 | Paucisymptomatic          | 203    | -3.39 | -0.08   | 0.02    | 0.21    | 4.51  | 0.14  | 0.56     | 0.32865              |         |
|                                                 | Symptomatic               | 319    | -2.49 | -0.06   | 0.07    | 0.28    | 16.32 | 0.24  | 1.16     | 0.00057              |         |
| Symptoms phase 1 (subjects with IgG ≥ 12)       | Fever                     | No     | 350   | -3.39   | -0.09   | 0.01    | 0.21  | 4.51  | 0.13     | 0.02725              | 0.02725 |
|                                                 |                           | Yes    | 263   | -2.49   | -0.06   | 0.05    | 0.25  | 16.32 | 0.24     |                      |         |
|                                                 | Low-grade fever           | No     | 481   | -3.39   | -0.08   | 0.02    | 0.23  | 16.32 | 0.19     | 0.17265              | 0.17265 |
|                                                 |                           | Yes    | 132   | -0.39   | -0.07   | 0.05    | 0.26  | 2.55  | 0.14     |                      |         |
|                                                 | Cough                     | No     | 372   | -3.39   | -0.08   | 0.01    | 0.19  | 16.32 | 0.14     | 0.01120              | 0.01120 |
|                                                 |                           | Yes    | 241   | -2.49   | -0.07   | 0.07    | 0.31  | 10.37 | 0.24     |                      |         |
|                                                 | Sore throat               | No     | 353   | -3.39   | -0.09   | 0.02    | 0.23  | 16.32 | 0.19     | 0.08309              | 0.08309 |
|                                                 |                           | Yes    | 260   | -2.49   | -0.07   | 0.04    | 0.25  | 4.51  | 0.16     |                      |         |
|                                                 | Muscle pain               | No     | 299   | -1.5    | -0.1    | 0       | 0.2   | 4.51  | 0.13     | 0.00763              | 0.00763 |
|                                                 |                           | Yes    | 314   | -3.39   | -0.06   | 0.06    | 0.27  | 16.32 | 0.22     |                      |         |
|                                                 | Asthenia                  | No     | 341   | -3.39   | -0.1    | 0       | 0.21  | 16.32 | 0.17     | 0.00574              | 0.00574 |
|                                                 |                           | Yes    | 272   | -2.49   | -0.06   | 0.07    | 0.25  | 10.37 | 0.19     |                      |         |
|                                                 | Anosmia / dysgeusia       | No     | 313   | -3.39   | -0.12   | -0.01   | 0.2   | 16.32 | 0.14     | 0.00006              | 0.00006 |
|                                                 |                           | Yes    | 300   | -0.86   | -0.05   | 0.06    | 0.28  | 10.37 | 0.22     |                      |         |
|                                                 | Gastrointestinal symptoms | No     | 403   | -3.39   | -0.08   | 0.03    | 0.21  | 10.37 | 0.17     | 0.46477              | 0.46477 |
|                                                 |                           | Yes    | 210   | -2.49   | -0.08   | 0.02    | 0.25  | 16.32 | 0.19     |                      |         |
|                                                 | Conjunctivitis            | No     | 517   | -3.39   | -0.08   | 0.02    | 0.21  | 16.32 | 0.18     | 0.16050              | 0.16050 |
|                                                 |                           | Yes    | 96    | -2.49   | -0.07   | 0.04    | 0.32  | 1.72  | 0.14     |                      |         |
|                                                 | Dyspnea                   | No     | 493   | -3.39   | -0.08   | 0.02    | 0.23  | 16.32 | 0.16     | 0.34700              | 0.34700 |
|                                                 |                           | Yes    | 120   | -2.49   | -0.07   | 0.05    | 0.26  | 10.37 | 0.24     |                      |         |
|                                                 | Chest pain                | No     | 502   | -3.39   | -0.08   | 0.01    | 0.24  | 10.37 | 0.15     | 0.08088              | 0.08088 |
|                                                 |                           | Yes    | 111   | -0.39   | -0.04   | 0.07    | 0.22  | 16.32 | 0.3      |                      |         |
|                                                 | Tachycardia               | No     | 512   | -3.39   | -0.08   | 0.01    | 0.21  | 4.51  | 0.13     | 0.02353              | 0.02353 |
|                                                 |                           | Yes    | 101   | -2.49   | -0.06   | 0.08    | 0.32  | 16.32 | 0.4      |                      |         |
| Pneumonia                                       | No                        | 568    | -3.39 | -0.08   | 0.02    | 0.22    | 16.32 | 0.15  | 0.18692  | 0.18692              |         |
|                                                 | Yes                       | 45     | -0.88 | -0.06   | 0.06    | 0.38    | 10.37 | 0.51  | 1.69     |                      |         |

<sup>a</sup> = Wilcoxon-Mann-Whitney test

312  
313  
314  
315  
316  
317  
318  
319  
320  
321  
322  
323  
324  
325

326 Table 3. Chi-squared analysis of groups < 10<sup>th</sup> percentile and > 90<sup>th</sup> percentile.

|                      |                             | < 10 perc | > 90 perc           | p_value             |
|----------------------|-----------------------------|-----------|---------------------|---------------------|
| Sex                  | F                           | 321       | 340                 | 0.0627              |
|                      | M                           | 133       | 105                 |                     |
| Age                  | 21-30                       | 93        | 83                  | 0.5429              |
|                      | 31-40                       | 108       | 94                  | 0.3804              |
|                      | 41-50                       | 121       | 142                 | 0.0970              |
|                      | 51-60                       | 88        | 98                  | 0.3711              |
|                      | 60+                         | 44        | 28                  | 0.0793              |
| BMI <sup>a</sup>     | 18.5 ≤ BMI < 25             | 267       | 255                 | 0.6963              |
|                      | BMI ≥ 30                    | 58        | 72                  | 0.1750              |
|                      | 25 ≤ BMI < 30               | 106       | 93                  | 0.4214              |
|                      | BMI < 18.5                  | 23        | 25                  | 0.8261              |
| Role                 | Other <sup>b</sup>          | 63        | 37                  | 0.0109              |
|                      | Anesthesiologist            | 6         | 7                   | 0.9701              |
|                      | Biologist                   | 5         | 2                   | 0.4640              |
|                      | Surgeon                     | 25        | 21                  | 0.7007              |
|                      | Physiotherapist             | 6         | 7                   | 0.9710              |
|                      | Nurse                       | 113       | 132                 | 0.1255              |
|                      | Physician                   | 56        | 61                  | 0.6082              |
|                      | Healthcare Partner Operator | 38        | 64                  | 0.0062              |
|                      | Front office (PARC)         | 31        | 28                  | 0.8494              |
|                      | Researcher                  | 13        | 9                   | 0.5485              |
|                      | Cleaning service            | 7         | 9                   | 0.7698              |
|                      | Transport Service           | 5         | 5                   | 0.7747 <sup>c</sup> |
|                      | Staff                       | 69        | 44                  | 0.0214              |
|                      | Student                     | 5         | 4                   | 0.9759 <sup>c</sup> |
|                      | Laboratory Technician       | 6         | 7                   | 0.9701              |
|                      | Radiology Technician        | 6         | 8                   | 0.7587              |
| Site                 | Other <sup>b</sup>          | 6         | 3                   | 0.5223 <sup>c</sup> |
|                      | Casa di Cura Cellini        | 19        | 8                   | 0.0573              |
|                      | Clinica Fornaca di Sessant  | 18        | 12                  | 0.3828              |
|                      | Humanitas Castelli          | 23        | 47                  | 0.0032              |
|                      | Humanitas Gavazzeni         | 97        | 142                 | 0.0005              |
|                      | Humanitas Gradenigo         | 36        | 22                  | 0.0918              |
|                      | Humanitas Mater Domini      | 20        | 23                  | 0.7041              |
|                      | Humanitas Medical Care      | 8         | 3                   | 0.2379 <sup>c</sup> |
|                      | Humanitas Rozzano           | 190       | 160                 | 0.0806              |
|                      | Humanitas San Pio X         | 27        | 21                  | 0.5025              |
| Humanitas University | 10                          | 4         | 0.1905 <sup>c</sup> |                     |

<sup>a</sup> = Some subjects did not indicate their BMI  
<sup>b</sup> = Refers to volunteers and other professionals that operate in several structures  
<sup>c</sup> = Minority class is less or equal to 5 (chi-square test is not reliable)

327  
328

329 Table 4. Chi-squared analysis of groups < 10<sup>th</sup> percentile and > 90<sup>th</sup> percentile per symptoms.

|                              |                                        |     | <10perc | >90perc             | p_value             | % Yes<10perc <sup>a</sup> | %Yes>90perc <sup>a</sup> |
|------------------------------|----------------------------------------|-----|---------|---------------------|---------------------|---------------------------|--------------------------|
| Symptoms                     | Fever                                  | No  | 360     | 284                 | 3.9E-07             | 37                        | 63                       |
|                              |                                        | Yes | 94      | 161                 |                     |                           |                          |
|                              | Low-grade fever                        | No  | 388     | 359                 | 0.0678              | 43                        | 57                       |
|                              |                                        | Yes | 66      | 86                  |                     |                           |                          |
|                              | Cough                                  | No  | 335     | 284                 | 0.0016              | 43                        | 58                       |
|                              |                                        | Yes | 119     | 161                 |                     |                           |                          |
|                              | Sore throat                            | No  | 302     | 271                 | 0.0923              | 47                        | 53                       |
|                              |                                        | Yes | 152     | 174                 |                     |                           |                          |
|                              | Muscle pain                            | No  | 310     | 246                 | 0.0001              | 42                        | 58                       |
|                              |                                        | Yes | 144     | 199                 |                     |                           |                          |
|                              | Asthenia                               | No  | 340     | 268                 | 3.7E-06             | 39                        | 61                       |
|                              |                                        | Yes | 114     | 177                 |                     |                           |                          |
|                              | Anosmia/dysgeusia                      | No  | 364     | 247                 | 4.0E-15             | 31                        | 69                       |
|                              |                                        | Yes | 90      | 198                 |                     |                           |                          |
|                              | Gastrointestinal symptoms              | No  | 336     | 313                 | 0.2485              | 47                        | 53                       |
|                              |                                        | Yes | 118     | 132                 |                     |                           |                          |
|                              | Conjunctivitis                         | No  | 400     | 382                 | 0.3633              | 46                        | 54                       |
|                              |                                        | Yes | 54      | 63                  |                     |                           |                          |
|                              | Dyspnea                                | No  | 405     | 375                 | 0.0370              | 41                        | 59                       |
|                              |                                        | Yes | 49      | 70                  |                     |                           |                          |
| Chest pain                   | No                                     | 415 | 367     | 0.0001              | 33                  | 67                        |                          |
|                              | Yes                                    | 39  | 78      |                     |                     |                           |                          |
| Tachycardia                  | No                                     | 406 | 371     | 0.0107              | 39                  | 61                        |                          |
|                              | Yes                                    | 48  | 74      |                     |                     |                           |                          |
| Pneumonia                    | No                                     | 440 | 420     | 0.0889              | 36                  | 64                        |                          |
|                              | Yes                                    | 14  | 25      |                     |                     |                           |                          |
| Total of Symptoms in phase I | Asymptomatic                           | 150 | 80      | 3.4E-07             | 65                  | 35                        |                          |
|                              | Paucisymptomatic                       | 179 | 158     | 0.2520              | 53                  | 47                        |                          |
|                              | Symptomatic                            | 125 | 207     | 5.6E-09             | 38                  | 62                        |                          |
| Comorbidities                | Chronic Obstructive Bronchopneumopathy | No  | 451     | 444                 | 0.6305 <sup>b</sup> |                           |                          |
|                              |                                        | Yes | 3       | 1                   |                     |                           |                          |
|                              | Asthma                                 | No  | 430     | 412                 | 0.2408              |                           |                          |
|                              |                                        | Yes | 24      | 33                  |                     |                           |                          |
|                              | Dyslipidemia                           | No  | 413     | 404                 | 0.9834              |                           |                          |
|                              |                                        | Yes | 41      | 41                  |                     |                           |                          |
|                              | Past Neoplasia                         | No  | 431     | 438                 | 0.0063              |                           |                          |
|                              |                                        | Yes | 23      | 7                   |                     |                           |                          |
|                              | Hypertension                           | No  | 401     | 409                 | 0.0915              |                           |                          |
|                              |                                        | Yes | 53      | 36                  |                     |                           |                          |
|                              | Past Coronaropathies                   | No  | 454     | 443                 | 0.4702 <sup>b</sup> |                           |                          |
|                              |                                        | Yes | 0       | 2                   |                     |                           |                          |
|                              | Atrial Fibrillation                    | No  | 450     | 441                 | 0.7439 <sup>b</sup> |                           |                          |
|                              |                                        | Yes | 4       | 4                   |                     |                           |                          |
|                              | Past Stroke/ TIA                       | No  | 452     | 445                 | 0.4878 <sup>b</sup> |                           |                          |
|                              |                                        | Yes | 2       | 0                   |                     |                           |                          |
|                              | Steatosis/Cyrrosis                     | No  | 448     | 444                 | 0.1359 <sup>b</sup> |                           |                          |
|                              |                                        | Yes | 6       | 1                   |                     |                           |                          |
|                              | Chronic kidney failure                 | No  | 453     | 445                 | 0.9920 <sup>b</sup> |                           |                          |
|                              |                                        | Yes | 1       | 0                   |                     |                           |                          |
|                              | Other liver diseases                   | No  | 452     | 441                 | 0.6641 <sup>b</sup> |                           |                          |
|                              |                                        | Yes | 2       | 4                   |                     |                           |                          |
|                              | Rheumatological diseases               | No  | 445     | 431                 | 0.3715              |                           |                          |
|                              |                                        | Yes | 9       | 14                  |                     |                           |                          |
|                              | Other diseases of the immune system    | No  | 418     | 409                 | 0.9726              |                           |                          |
|                              |                                        | Yes | 36      | 36                  |                     |                           |                          |
|                              | Diabetes mellitus                      | No  | 452     | 443                 | 0.6305 <sup>b</sup> |                           |                          |
| Yes                          |                                        | 2   | 2       |                     |                     |                           |                          |
| Gotta                        | No                                     | 452 | 445     | 0.4878 <sup>b</sup> |                     |                           |                          |
|                              | Yes                                    | 2   | 0       |                     |                     |                           |                          |

<sup>a</sup> = Percentage of subjects with symptoms (Yes) per rate class  
<sup>b</sup> = Minority class is less or equal to 5 (chi-square test is not reliable)

330

331

332

333 **Figure legends**

334

335 **Figure 1: a**, Dataset < 10<sup>th</sup> percentile Regression Diagnostic plot of amount of IgG after Yeo-  
336 Johnson normalization against residuals of training and test data; **b**, Dataset >90<sup>th</sup> percentile  
337 Regression Diagnostic plot of amount of IgG after Yeo-Johnson normalization against residuals of  
338 training and test data; **c**, Barplot with Logistic Regression coefficients for most important features;  
339 **d**, Odds ratio of Logistic Regression with confidence intervals (95%) for the most important  
340 features.

341

342 **Figure 2:** Anti-Spike S1/S2 IgG plasma levels in asymptomatics (n=61), paucisymptomatics  
343 (n=163) and symptomatics (n=275) measured at three different time points (phase 1-3). Each dot  
344 corresponds to an individual subject. Log scale on Y axis. The box plots show the interquartile  
345 range, the horizontal lines show the median values and the whiskers indicate the minimum-to-  
346 maximum range. *P* values were determined using one-tailed Wilcoxon matched-pairs signed rank  
347 test.

348

349 **References**

350

- 351 1. Dan JM, *et al.* Immunological memory to SARS-CoV-2 assessed for up to 8 months after  
352 infection. *Science* **371**, (2021).
- 353 2. Ward H, *et al.* Declining prevalence of antibody positivity to SARS-CoV-2: a community  
354 study of 365,000 adults. *medRxiv*, 2020.2010.2026.20219725 (2020).
- 355 3. Long QX, *et al.* Clinical and immunological assessment of asymptomatic SARS-CoV-2  
356 infections. *Nat Med* **26**, 1200-1204 (2020).
- 357 4. Sandri MT, *et al.* SARS-CoV-2 serology in 4000 health care and administrative staff across  
358 seven sites in Lombardy, Italy. *Sci Rep* **11**, 12312 (2021).
- 359 5. Carfi A, Bernabei R, Landi F, Group fitGAC-P-ACS. Persistent Symptoms in Patients After  
360 Acute COVID-19. *JAMA* **324**, 603-605 (2020).
- 361 6. Butowt R, von Bartheld CS. Anosmia in COVID-19: Underlying Mechanisms and  
362 Assessment of an Olfactory Route to Brain Infection. *Neuroscientist*, 1073858420956905  
363 (2020).
- 364 7. Lechien JR, *et al.* Clinical and epidemiological characteristics of 1420 European patients  
365 with mild-to-moderate coronavirus disease 2019. *J Intern Med* **288**, 335-344 (2020).
- 366 8. Kumar N, Bhartiya S, Desai S, Mutha A, Beldar A, Singh T. Seroprevalence of Antibodies  
367 Against SARS-CoV-2 Among Health Care Workers in Mumbai, India. *Asia Pac J Public*  
368 *Health*, 1010539520977307 (2020).
- 369 9. Pierron D, *et al.* Smell and taste changes are early indicators of the COVID-19 pandemic  
370 and political decision effectiveness. *Nat Commun* **11**, 5152 (2020).

- 371 10. Brann DH, *et al.* Non-neuronal expression of SARS-CoV-2 entry genes in the olfactory  
372 system suggests mechanisms underlying COVID-19-associated anosmia. *Sci Adv* **6**, (2020).
- 373 11. De Melo GD, *et al.* COVID-19-related anosmia is associated with viral persistence and  
374 inflammation in human olfactory epithelium and brain infection in hamsters. *Sci Transl*  
375 *Med*, (2021).
- 376 12. Bilinska K, Jakubowska P, Von Bartheld CS, Butowt R. Expression of the SARS-CoV-2  
377 Entry Proteins, ACE2 and TMPRSS2, in Cells of the Olfactory Epithelium: Identification of  
378 Cell Types and Trends with Age. *ACS Chem Neurosci* **11**, 1555-1562 (2020).
- 379 13. Chen M, *et al.* Elevated ACE-2 expression in the olfactory neuroepithelium: implications  
380 for anosmia and upper respiratory SARS-CoV-2 entry and replication. *Eur Respir J* **56**,  
381 (2020).
- 382 14. Politi LS, Salsano E, Grimaldi M. Magnetic Resonance Imaging Alteration of the Brain in a  
383 Patient With Coronavirus Disease 2019 (COVID-19) and Anosmia. *JAMA Neurol* **77**, 1028-  
384 1029 (2020).
- 385 15. Tsvigoulis G, *et al.* Olfactory bulb and mucosa abnormalities in persistent COVID-19-  
386 induced anosmia: a magnetic resonance imaging study. *Eur J Neurol*, (2020).
- 387 16. Laurendon T, *et al.* Bilateral transient olfactory bulb edema during COVID-19-related  
388 anosmia. *Neurology* **95**, 224-225 (2020).
- 389 17. Yan CH, Prajapati DP, Ritter ML, DeConde AS. Persistent Smell Loss Following  
390 Undetectable SARS-CoV-2. *Otolaryngol Head Neck Surg* **163**, 923-925 (2020).
- 391 18. Krammer F, *et al.* Antibody Responses in Seropositive Persons after a Single Dose of  
392 SARS-CoV-2 mRNA Vaccine. *N Engl J Med* **384**, 1372-1374 (2021).
- 393 19. Saadat S, *et al.* Binding and Neutralization Antibody Titers After a Single Vaccine Dose in  
394 Health Care Workers Previously Infected With SARS-CoV-2. *JAMA* **325**, 1467-1469  
395 (2021).
- 396 20. Abu Jabal K, *et al.* Impact of age, ethnicity, sex and prior infection status on  
397 immunogenicity following a single dose of the BNT162b2 mRNA COVID-19 vaccine: real-  
398 world evidence from healthcare workers, Israel, December 2020 to January 2021. *Euro*  
399 *Surveill* **26**, (2021).
- 400 21. Levi R, *et al.* One dose of SARS-CoV-2 vaccine exponentially increases antibodies in  
401 recovered individuals with symptomatic COVID-19. *J Clin Invest*, (2021) in press.
- 402 22. Bonelli F, *et al.* Clinical And Analytical Performance Of An Automated Serological Test  
403 That Identifies S1/S2 Neutralizing IgG In COVID-19 Patients Semiquantitatively. *J Clin*  
404 *Microbiol*, (2020).
- 405 23. Yeo IK, Johnson RA. A new family of power transformations to improve normality or  
406 symmetry. *Biometrika* **87**, 954-959 (2000).
- 407
- 408



**a**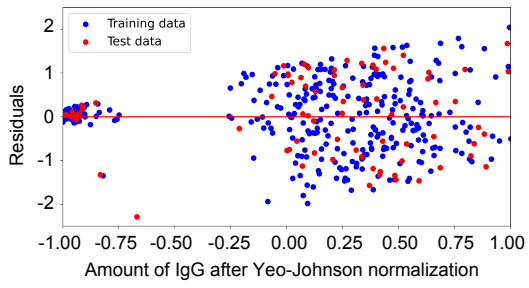**b**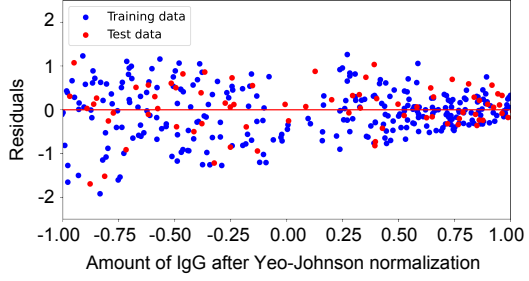**c**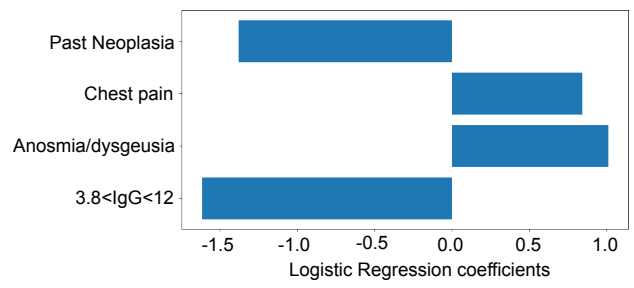**d**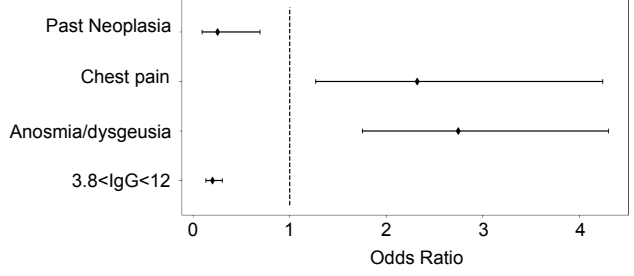

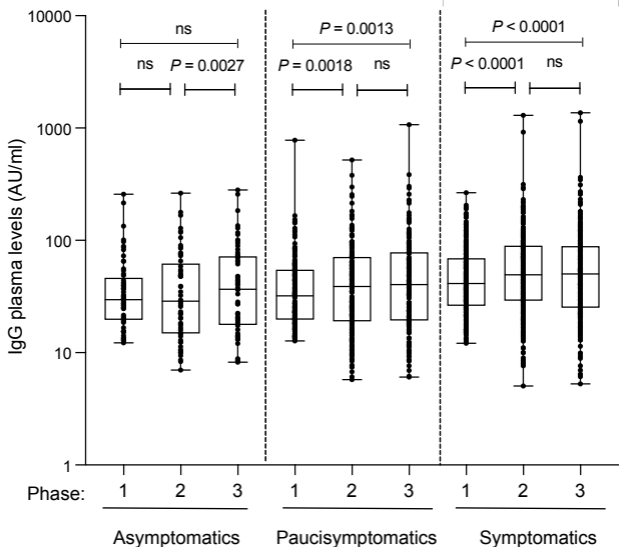

Source: https://www.medrxiv.org/content/10.1101/2021.02.05.21251219.full.pdf
