1 **The antibody response to SARS-CoV-2 increases over 5 months in patients with**  
2 **anosmia/dysgeusia**

3  
4 Riccardo Levi<sup>1,2\*</sup>, Leonardo Ubaldi<sup>1,2\*</sup>, Chiara Pozzi<sup>2</sup>, Giovanni Angelotti<sup>2</sup>, Maria Teresa Sandri<sup>1,2</sup>,  
5 Elena Azzolini<sup>1,2</sup>, Michela Salvatici<sup>2</sup>, Victor Savevski<sup>2</sup>, Alberto Mantovani<sup>1,2,3</sup> and Maria  
6 Rescigno<sup>1,2,#</sup>

7  
8 <sup>1</sup>Humanitas University, Department of Biomedical Sciences, Via Rita Levi Montalcini, 20090 Pieve  
9 Emanuele, MI, Italy.

10 <sup>2</sup>Humanitas Clinical and Research Center - IRCCS, Via Manzoni 56, 20089 Rozzano, MI, Italy.

11 <sup>3</sup>The William Harvey Research Institute, Queen Mary University of London, London, UK

12  
13 \*These authors contributed equally to the work

14  
15  
16 #Corresponding author

17 E-mail: [maria.rescigno@hunimed.eu](mailto:maria.rescigno@hunimed.eu)

18 Humanitas University

19 Via Rita Levi Montalcini, 4

20 20090 Pieve Emanuele (MI) Italy

21

22

23

24

25

26

27

28

29 **Abstract**

30

31 The factors involved in the persistence of antibodies to SARS-CoV-2 are unknown. We evaluated the  
32 antibody response to SARS-CoV-2 in personnel from 10 healthcare facilities and its association with  
33 individuals' characteristics and COVID-19 symptoms in an observational study. We enrolled 4735  
34 subjects (corresponding to 80% of all personnel) over a period of 5 months when the spreading of the  
35 virus was drastically reduced. For each participant, we determined the rate of antibody increase or  
36 decrease over time in relation to 93 features analyzed in univariate and multivariate analyses through  
37 a machine learning approach. In individuals positive for IgG ( $\geq 12$  AU/mL) at the beginning of the  
38 study, we found an increase [ $p= 0.0002$ ] in antibody response in symptomatic subjects, particularly  
39 with anosmia/dysgeusia (OR 2.75, 95% CI 1.753 – 4.301), in a multivariate logistic regression  
40 analysis. This may be linked to the persistence of SARS-CoV-2 in the olfactory bulb.

41

42

## 43 **Introduction**

44 It is becoming clear that the antibody response to SARS-CoV-2 can last at least 6 months in  
45 symptomatic patients <sup>1</sup>, but it seems to decline in asymptomatics <sup>2</sup>. Similarly, a reduction of antibody  
46 response in asymptomatic individuals was shown in a study with a fewer number of individuals (n =  
47 37) <sup>3</sup>. The antibody response in COVID-19 patients is associated with the establishment of a memory  
48 B cell response which is higher at 6 months <sup>1</sup>, however, it is not clear whether there are features that  
49 correlate with this sustained B cell response. We previously showed that an anti-SARS-CoV-2  
50 serological analysis allowed us to follow the diffusion of the virus within healthcare facilities in areas  
51 differently hit by the virus <sup>4</sup>. At 5 months of distance, we analyzed the duration of this antibody  
52 response and evaluated whether there were features correlating with maintenance, reduction or  
53 increase of the antibody response.

54

## 55 **Results**

56 We assessed the correlation of the rate of antibody increase or decrease with the different analyzed  
57 features. In Tables 1 and 2 are reported the rates for individual classes of features with relative  
58 statistical analysis. As shown, in the 5 months of observation, females sustained the antibody  
59 response better than males ( $p = 0.01$ ); similarly non-medical healthcare professionals (specifically,  
60 healthcare partner operators) had higher antibody rates ( $p = 0.0009$ ). The levels of antibodies  
61 increased in hospitals located in the Bergamo area (Castelli and Gavazzeni  $p < 0.0001$ ) (Table 1)  
62 which was more hit by COVID-19 (37 – 43% of individuals with  $\text{IgG} \geq 12$ )<sup>7</sup>. More important, the  
63 IgG rate in individuals which were positive for IgG ( $\text{IgG} \geq 12$  AU/mL; n = 613) at the beginning of  
64 the study was increased ( $p < 0.000001$ ) over time, and this increase was either minor in asymptomatics  
65 (n = 91,  $p = 0.00003$ ) and paucisymptomatics (n = 203) or strong in symptomatics (n = 319,  $p =$   
66  $0.0006$ ) (Table 2). On the contrary, those that had an intermediate IgG titer ( $3.8 < \text{IgG} < 12$  AU/mL  
67 considered as negative) displayed all a significant reduction in IgG rate ( $p < 0.000001$ ) (Table 1).  
68 This may be due to a noise in test analysis as these subjects are considered as negative for SARS-  
69 CoV-2 IgG according to manufacturer. Many symptoms, including fever, cough, muscle pain,  
70 asthenia, tachycardia and anosmia/dysgeusia, correlated with an increase of antibodies in the 5-month  
71 observation period (Table 2).

72 As we noticed that the distribution of the rate feature presented a high value of kurtosis (see methods)  
73 we restricted the data set to subjects with IgG rates either below the 10<sup>th</sup> percentile [ $< -0.033$  (n =  
74 454)] or above the 90<sup>th</sup> percentile [ $> 0.005$  (n = 445)] to prevent a bias-variance problem in machine  
75 learning models. The accuracy of these rates was confirmed by a linear regression analysis. In Figure  
76 1a and 1b are shown the regression diagnostic plots of predicted values against residuals of training

77 and test data according to the threshold ( $< -0.033$  AU/ml\*day and  $> 0.005$  AU/ml\*day). In Table 3  
78 is shown the Chi-squared analysis for the populations below or above the set threshold rates. We  
79 found that as for the previous analysis, males reduced the level of antibodies more than females, even  
80 though this difference was no longer statistically significant ( $p = 0.06$ ). The levels of antibodies  
81 increased in hospitals located in the Bergamo area (Castelli and Gavazzeni:  $p = 0.0032$  and  $p =$   
82  $0.0005$ , respectively) which was more hit by COVID-19 (37 – 43% of individuals with  $\text{IgG} \geq 12$ )<sup>7</sup>  
83 while it decreased in Humanitas Rozzano ( $p=0.0806$ ) which was less heavily hit (10% of individuals  
84 with  $\text{IgG} \geq 12$ )<sup>7</sup> (Table 3). The rate decreased in asymptomatic (65% of subjects fell in the group  $<$   
85  $-0.033$ ;  $p < 0.000001$ ), remained constant in paucisymptomatic and increased in symptomatic  
86 individuals (62% of subjects were in the group  $> 0.005$ ;  $p < 0.000001$ ) (Table 4). Interestingly, among  
87 the different symptoms, fever, cough, muscle pain, asthenia, dyspnea, tachycardia, chest pain and  
88 anosmia/dysgeusia all correlated with a higher number of individuals falling into the group with rate  
89  $> 0.005$ , indicating that these symptoms were strongly associated with sustained/increased antibody  
90 response ( $0.000001 < p < 0.05$ , Table 4). Among these, anosmia/dysgeusia was associated with the  
91 highest percentage of subjects presenting with increased IgG rate (69%;  $p < 0.000001$ , Table 4).  
92 Having observed differences according to sex, role and site, and since many symptoms are linked,  
93 we performed a multivariate logistic regression analysis based in a machine learning approach (see  
94 methods). We performed a Bagging classifier of 7 logistic analysis on a training (Accuracy = 76.26;  
95 ROC AUC = 76.30; Recall = 81.14) and a test dataset (Accuracy = 72.00; ROC AUC = 72.12; Recall  
96 = 81.08). In Figure 1c is shown the multivariate logistic regression analysis. We found that the  
97 increased rate was associated primarily with anosmia/dysgeusia (regression coefficient=1.0, 95% CI  
98 0.56 – 1.46) and with chest pain (regression coefficient=0.84, 95% CI 0.24 – 1.44), while the  
99 decreased rate was associated to subjects with intermediate IgG ( $3.8 < \text{IgG} < 12$ ) (regression  
100 coefficient = -1.61, 95% CI -2.03 – -1.0), which may be related to a noise in the instrument testing,  
101 and with past neoplasia (regression coefficient = -1.38, 95% CI -2.4 – -0.37). Interestingly, 54% of  
102 subjects with chest pain also presented loss of smell/taste while only 22% of subjects with smell/taste  
103 dysfunction also had chest pain, suggesting that IgG increase in the symptomatic population is  
104 primarily linked to anosmia and dysgeusia (not shown). In figure 1d are shown the odds ratio relative  
105 to figure 1c, which for chest pain is 2.32 (95% CI 1.27 – 4.24), for anosmia/dysgeusia is 2.75 (95%  
106 CI 1.75 – 4.30), for subjects with intermediate IgG ( $3.8 < \text{IgG} < 12$ ) is 0.2 (95% CI 0.13 – 0.30) and  
107 for subjects with past neoplasia is 0.25 (95% CI 0.09 – 0.69). Overall, these results indicate that  
108 although many symptoms are associated with an increase of IgG abundance in the observation time,  
109 only anosmia/dysgeusia and chest pain are associated to a higher IgG rate in the multivariate logistic

110 regression analysis. By contrast the population with past neoplasia or intermediate levels of IgG (3.8  
111  $< \text{IgG} < 12 \text{ AU/mL}$ ) are the one that display a reduction in IgG.

112

## 113 **Discussion**

114 We analyzed the 5-month duration of an antibody response to SARS-CoV-2 in personnel from 9  
115 healthcare facilities and an international medical school (Humanitas University) in Northern Italy in  
116 areas differently hit by the virus <sup>4</sup>. We show that the antibody response is stable both in symptomatic  
117 and asymptomatic/paucisymptomatic individuals and is increased in females and in non-medical  
118 healthcare professionals. Previously, it has been shown in a study conducted in the British population  
119 that the antibody response declines of nearly 22% in symptomatic individuals and of 64% in  
120 asymptomatic individuals <sup>2</sup>. However, this study was based on a prick qualitative test and thus the  
121 decline may be related to the sensitivity of the test. We also observed that the antibody response  
122 declined when we analyzed the group ( $3.8 < \text{IgG} < 12 \text{ AU/mL}$ ) with IgG between the limit of  
123 detection ( $3.8 \text{ AU/mL}$ ) and the threshold of positivity ( $\text{IgG} \geq 12 \text{ AU/mL}$ ), as set by manufacturer.  
124 Whether this is linked to a noise of the instrument that may change according to the test or to a real  
125 reduction in an antibody response that may or may not be specific to SARS-CoV-2, remains to be  
126 established. When we analyzed the extremes, i.e. the individuals with higher rates of antibody  
127 increase or decrease ( $< -0.033$  and  $> 0.005 \text{ AU/mL*day}$ ) we observed that asymptomatics had higher  
128 negative rates while symptomatics tended to continue increasing the antibody levels suggesting that  
129 extreme changes in rate separate the symptomatics from the asymptomatics. As during the  
130 observation time there was very limited viral diffusion in Northern Italy, as confirmed also by the  
131 finding that only 2 individuals became IgG positive and 2981 remained IgG negative throughout the  
132 study (all excluded from the analysis), we can conclude that the sustained or augmented antibody  
133 response may not be linked to a re-exposure to the virus. In an attempt to address what improved the  
134 antibody response, we found that several symptoms were associated to increased rates of antibodies,  
135 however, in a multivariate logistic analysis only anosmia/dysgeusia and chest pain were linked with  
136 the highest regression coefficients. Chest pain and anosmia are long-lasting symptoms in COVID-19  
137 patients <sup>8</sup>. In addition, anosmia and/or dysgeusia are very common as they are found in around 50-  
138 70% of subjects affected by COVID-19 <sup>9, 10</sup>. In our cohort (Table 2), 49% of IgG positive subjects  
139 had anosmia/dysgeusia, 28% chest pain and 13.7% both anosmia/dysgeusia and chest pain,  
140 suggesting that indeed these two symptoms may, either alone or in combination, associate with IgG  
141 increase. We and others previously found that anosmia/dysgeusia together with fever were the  
142 symptoms that mostly characterized SARS-CoV-2 exposure <sup>4, 11</sup>. In agreement, anosmia and  
143 dysgeusia have been proposed to be used to track SARS-CoV-2 diffusion <sup>12</sup>. Interestingly, SARS-

144 CoV-2 can infect the olfactory epithelium<sup>13, 14</sup>, including olfactory sensory neurons, support cells  
145 and immune cells, that express the viral entry receptors ACE2 and TMPRSS2<sup>13, 15, 16</sup>. Here, the virus  
146 can persist long and induce local inflammation<sup>14</sup> and olfactory bulb abnormalities<sup>17, 18, 19</sup>. In  
147 agreement, the loss of smell and taste can persist in individuals even with RT-PCR SARS-CoV-2  
148 negativity in the nasopharyngeal swab<sup>14, 20</sup>.

149 Overall, these data suggest that increased antibody response in patients with anosmia/dysgeusia may  
150 be linked to persistence of the virus in the olfactory bulb which through local inflammation and  
151 release of antigens, maintains and boosts the antibody response. This study opens new perspectives  
152 on the immunity to SARS-CoV-2 and warrants further investigation on the role of anosmia/dysgeusia  
153 on antibody response through the design of prospective observational studies coupling the testing of  
154 SARS-CoV-2 persistence in the olfactory bulb, loss of smell or taste and antibody titers.

155

## 156 **Methods**

### 157 Study population

158 This observational study has been approved by the international review board of Istituto Clinico  
159 Humanitas for all participating institutes (clinicaltrials.gov NCT04387929). Accrual was on a  
160 voluntary basis: it started on April 28<sup>th</sup> and more than 80% of personnel participated (n = 4735). The  
161 study foresees 4 blood collections every 3/4 months. 10 different centers participate: Istituto Clinico  
162 Humanitas (ICH), Rozzano (MI); Humanitas Gavazzeni, Bergamo; Humanitas Castelli, Bergamo;  
163 Humanitas Mater Domini (HMD), Castellanza (VA); Humanitas Medical Center, HMC, Varese;  
164 Humanitas University, Pieve Emanuele (MI); Humanitas San Pio X, Milano; Humanitas Cellini,  
165 Torino; Humanitas Gradenigo, Torino; Clinica Fornaca, Torino. All participants signed an informed  
166 consent and filled a questionnaire before blood collection. We analyzed 93 features (72 categorical  
167 and 17 numerical and 4 temporal) including, age, sex, location, professional role, time between  
168 sample collections, COVID-19 symptoms (fever, sore throat, cough, muscle pain, asthenia,  
169 anosmia/dysgeusia (loss of smell and taste), gastrointestinal disorders, conjunctivitis, dyspnea, chest  
170 pain, tachycardia, pneumonia), home exits and smart-working, comorbidities (diabetes, asthma,  
171 neoplasia, autoimmunity, cardiovascular disorders, hepatic disorders). After excluding for employees  
172 that became positive for SARS-CoV-2 IgG (n = 2) during the observation period and those that  
173 dropped from phase I or for which we were missing at least two features, we analyzed 4534  
174 participants (4.25% drop out). Here we show the results of the end of phase II (second blood  
175 sampling).

176

### 177 IgG measure

178 For the determination of IgG anti SARS-CoV-2, the Liaison SARS-CoV-2 S1/S2 IgG assay  
179 (DiaSorin, Saluggia (VC), Italy) was used <sup>5</sup>. The method is an indirect chemiluminescence  
180 immunoassay for the determination of anti-S1 and anti-S2 specific antibodies. According to kit  
181 manufacturer, the test discriminates among negative (< 12AU/mL; with 3.8 as the limit of IgG  
182 detection) and positive ( $\geq 12.0$  AU/mL) subjects. However, we considered also individuals with IgG  
183 comprised between 3.8 and 12 AU/mL (which we called IgG med:  $3.8 < \text{IgG} < 12.0$  AU/mL).  
184 Consistency and reproducibility of the antibody test in samples collected in the two time points was  
185 confirmed for a limited number of individuals (n = 50) displaying different degrees of IgG positivity.

186

### 187 Statistical analysis and model

188 We first cleared the dataset by eliminating data from all of those subjects that did not develop an IgG  
189 response over time ( $\text{IgG} \leq 3.8$  at the beginning and at the end of the examination) (n = 2981). We  
190 then analyzed the rate of antibody response defined as:

191

$$192 \text{RATE} = \frac{\text{IgG phase II} - \text{IgG phase I}}{\Delta \text{days}} = [\text{AU} / \text{mL} * \text{day}]$$

193

$$\Delta \text{days}$$

194

195 Positive rates mean increased antibody response, while negative rates indicate reduction of antibody  
196 response between the two analyzed time points.

197 For statistical analysis, we performed both a univariate and a multivariate analysis. We applied  
198 Wilcoxon-Mann-Whitney statistical non-parametric test to compare the antibody rate distribution  
199 between classes of subjects (Table 1 and Table 2).

200 We analyzed the distribution of the rate feature and found a high value of kurtosis (461) around the  
201 median value of 0.016, hence to perform a multivariate analysis we restricted the data set to subjects  
202 with IgG rates either below the 10<sup>th</sup> percentile or above the 90<sup>th</sup> percentile to prevent a bias-variance  
203 problem in machine learning models and subjected the data to a linear regression analysis between  
204 the training and test data sets, where the target variable (rate of antibodies) was standardized using  
205 the Yeo-Johnson method <sup>6</sup>. We then applied Chi-squared statistical test to evaluate differences  
206 between classes and the rate thresholds described above (Tables 3 and 4). In order to evaluate the  
207 possible interactions between features and the rate of antibody response, we developed a multivariate  
208 approach to perform a binary classification between subjects who increased or decreased the level of  
209 antibodies. A set of 7 logistic regressions has been applied on data using a bootstrap procedure  
210 (samples are drawn with replacement) and the output of each classifier has been averaged by a  
211 Bagging classifier to obtain the final output. The selection of hyperparameters of the machine learning



212 model and the feature selection has been performed with a Bayesian optimization approach based on  
213 cross validation (4 folds, stratified by outcome).

214

#### 215 Data availability

216 Data supporting the findings of this study are available within the paper. All other data are available  
217 from the corresponding author upon reasonable requests.

218

#### 219 **References**

- 220 1. Dan JM, *et al.* Immunological memory to SARS-CoV-2 assessed for greater than six months  
221 after infection. *bioRxiv*, 2020.2011.2015.383323 (2020).
- 222 2. Ward H, *et al.* Declining prevalence of antibody positivity to SARS-CoV-2: a community  
223 study of 365,000 adults. *medRxiv*, 2020.2010.2026.20219725 (2020).
- 224 3. Long QX, *et al.* Clinical and immunological assessment of asymptomatic SARS-CoV-2  
225 infections. *Nat Med* **26**, 1200-1204 (2020).
- 226 4. Sandri MT, *et al.* SARS-CoV-2 serology in 4000 health care and administrative staff across  
227 seven sites in Lombardy, Italy. *medRxiv*, 2020.2005.2024.20111245 (2020).
- 228 5. Bonelli F, *et al.* Clinical And Analytical Performance Of An Automated Serological Test That  
229 Identifies S1/S2 Neutralizing IgG In COVID-19 Patients Semiquantitatively. *J Clin*  
230 *Microbiol*, (2020).
- 231 6. Yeo IK, Johnson RA. A new family of power transformations to improve normality or  
232 symmetry. *Biometrika* **87**, 954-959 (2000).
- 233 7. Sandri M, Elena Azzolini, Valter Torri, Sara Carloni, Michele Tedeschi, Massimo Castoldi,  
234 Alberto Mantovani, Maria Rescigno. IgG serology in health care and administrative staff  
235 populations from 7 hospital representative of different exposures to SARS-CoV-2 in  
236 Lombardy, Italy. *MedrXiv*, (2020).
- 237 8. Carfi A, Bernabei R, Landi F, Group ftGAC-P-ACS. Persistent Symptoms in Patients After  
238 Acute COVID-19. *JAMA* **324**, 603-605 (2020).
- 239 9. Butowt R, von Bartheld CS. Anosmia in COVID-19: Underlying Mechanisms and  
240 Assessment of an Olfactory Route to Brain Infection. *Neuroscientist*, 1073858420956905  
241 (2020).
- 242 10. Lechien JR, *et al.* Clinical and epidemiological characteristics of 1420 European patients with  
243 mild-to-moderate coronavirus disease 2019. *J Intern Med* **288**, 335-344 (2020).



- 244 11. Kumar N, Bhartiya S, Desai S, Mutha A, Beldar A, Singh T. Seroprevalence of Antibodies  
245 Against SARS-CoV-2 Among Health Care Workers in Mumbai, India. *Asia Pac J Public*  
246 *Health*, 1010539520977307 (2020).
- 247 12. Pierron D, *et al.* Smell and taste changes are early indicators of the COVID-19 pandemic and  
248 political decision effectiveness. *Nat Commun* **11**, 5152 (2020).
- 249 13. Brann DH, *et al.* Non-neuronal expression of SARS-CoV-2 entry genes in the olfactory  
250 system suggests mechanisms underlying COVID-19-associated anosmia. *Sci Adv* **6**, (2020).
- 251 14. De Melo GD, *et al.* COVID-19-associated olfactory dysfunction reveals SARS-CoV-2  
252 neuroinvasion and persistence in the olfactory system. *bioRxiv*, 2020.2011.2018.388819  
253 (2020).
- 254 15. Bilinska K, Jakubowska P, Von Bartheld CS, Butowt R. Expression of the SARS-CoV-2  
255 Entry Proteins, ACE2 and TMPRSS2, in Cells of the Olfactory Epithelium: Identification of  
256 Cell Types and Trends with Age. *ACS Chem Neurosci* **11**, 1555-1562 (2020).
- 257 16. Chen M, *et al.* Elevated ACE-2 expression in the olfactory neuroepithelium: implications for  
258 anosmia and upper respiratory SARS-CoV-2 entry and replication. *Eur Respir J* **56**, (2020).
- 259 17. Politi LS, Salsano E, Grimaldi M. Magnetic Resonance Imaging Alteration of the Brain in a  
260 Patient With Coronavirus Disease 2019 (COVID-19) and Anosmia. *JAMA Neurol* **77**, 1028-  
261 1029 (2020).
- 262 18. Tsvigoulis G, *et al.* Olfactory bulb and mucosa abnormalities in persistent COVID-19-  
263 induced anosmia: a magnetic resonance imaging study. *Eur J Neurol*, (2020).
- 264 19. Laurendon T, *et al.* Bilateral transient olfactory bulb edema during COVID-19-related  
265 anosmia. *Neurology* **95**, 224-225 (2020).
- 266 20. Yan CH, Prajapati DP, Ritter ML, DeConde AS. Persistent Smell Loss Following  
267 Undetectable SARS-CoV-2. *Otolaryngol Head Neck Surg* **163**, 923-925 (2020).
- 268

## 269 **Acknowledgments**

270 This work was partially supported by a philanthropic donation by Dolce & Gabbana, by the Italian  
271 Ministry of Health (Ricerca corrente) and by Fondazione Humanitas per la Ricerca.

272 We would like to thank all the employees that volunteered to participate to this study, all the nurses  
273 and personnel that collected the samples and the laboratory technicians that run the serological and  
274 rinopharyngeal tests. We would also like to thank the Humanitas management and staff, Drs Patrizia  
275 Meroni, Michele Lagioia and Michele Tedeschi, who warmly supported this study for the safety of  
276 the employees.

277

278 **Author contribution**

279 R.L. and L.U.: performed data analysis; C.P.: contributed to data analysis and manuscript writing;  
280 G.A. and V.S.: contributed to data analysis; M.T.S.: coordinated and supervised the laboratory  
281 analyses; E.A.: coordinated the recruitment and sampling of subjects (project administration) and  
282 participated in clinical study design; M.S.: carried out the laboratory analyses; A.M.:  
283 conceptualization and funding acquisition; M.R.: conceived the study, analyzed the data and wrote  
284 the manuscript.

285

286 **Competing interests**

287 The authors declare no competing interests.

288

289

290 **Tables**

291 Table 1. Demographic distribution of antibody rates.

|                      |                             | counts | min   | 25 perc | 50 perc | 75 perc | max   | mean  | St.Dev. | p_value <sup>a</sup> |
|----------------------|-----------------------------|--------|-------|---------|---------|---------|-------|-------|---------|----------------------|
| Sex                  | F                           | 1105   | -3.39 | -0.04   | -0.02   | 0.02    | 16.32 | 0.07  | 0.61    | 0.0139               |
|                      | M                           | 448    | -0.88 | -0.04   | -0.02   | 0       | 10.37 | 0.03  | 0.53    |                      |
| Age                  | 21-30                       | 300    | -3.39 | -0.04   | -0.02   | 0.01    | 4.51  | 0.03  | 0.41    | 0.2644               |
|                      | 31-40                       | 365    | -0.92 | -0.04   | -0.02   | 0.01    | 2.26  | 0.02  | 0.21    | 0.2302               |
|                      | 41-50                       | 455    | -2.49 | -0.04   | -0.02   | 0.03    | 3.11  | 0.06  | 0.37    | 0.1083               |
|                      | 51-60                       | 309    | -0.88 | -0.04   | -0.01   | 0.02    | 16.32 | 0.1   | 0.96    | 0.1442               |
|                      | 60+                         | 124    | -0.68 | -0.04   | -0.02   | -0.01   | 10.37 | 0.12  | 0.99    | 0.0586               |
| BMI <sup>b</sup>     | 18.5 ≤ BMI < 25             | 940    | -0.92 | -0.04   | -0.02   | 0.01    | 10.37 | 0.03  | 0.41    | 0.3821               |
|                      | BMI ≥ 30                    | 106    | -3.39 | -0.05   | -0.02   | 0.14    | 16.32 | 0.23  | 1.69    | 0.2182               |
|                      | 25 ≤ BMI < 30               | 347    | -0.57 | -0.04   | -0.02   | 0.01    | 3.11  | 0.05  | 0.29    | 0.3933               |
|                      | BMI < 18.5                  | 73     | -0.22 | -0.04   | -0.02   | 0.02    | 1.27  | 0.05  | 0.26    | 0.3959               |
| IgG class phase I    | IgG ≥ 12                    | 613    | -3.39 | -0.08   | 0.02    | 0.23    | 16.32 | 0.18  | 0.92    | 2.1 E-10             |
|                      | IgG ≤ 3.8                   | 74     | 0.01  | 0.01    | 0.02    | 0.03    | 0.08  | 0.02  | 0.01    | 1.5 E-15             |
|                      | 3.8 < IgG < 12              | 866    | -0.13 | -0.03   | -0.02   | -0.01   | 0.83  | -0.02 | 0.04    | 8.0 E-22             |
| Role                 | Other <sup>c</sup>          | 200    | -0.57 | -0.04   | -0.02   | -0.01   | 16.32 | 0.09  | 1.17    | 0.0116               |
|                      | Anesthesiologist            | 19     | -0.83 | -0.04   | -0.02   | 0.01    | 0.09  | -0.05 | 0.2     | 0.4305 <sup>b</sup>  |
|                      | Biologist                   | 18     | -0.18 | -0.05   | -0.02   | -0.02   | 0.03  | -0.04 | 0.05    | 0.0978 <sup>b</sup>  |
|                      | Surgeon                     | 67     | -0.88 | -0.05   | -0.02   | 0.07    | 0.61  | 0.02  | 0.21    | 0.2653               |
|                      | Physiotherapist             | 21     | -0.12 | -0.04   | -0.02   | 0.01    | 0.35  | 0.01  | 0.1     | 0.4204               |
|                      | Nurse                       | 398    | -3.39 | -0.04   | -0.02   | 0.04    | 3.11  | 0.08  | 0.41    | 0.0581               |
|                      | Physician                   | 210    | -0.92 | -0.04   | -0.01   | 0.02    | 10.37 | 0.08  | 0.75    | 0.0804               |
|                      | Healthcare Partner Operator | 149    | -2.49 | -0.03   | -0.01   | 0.17    | 1.55  | 0.1   | 0.38    | 0.0009               |
|                      | Front office (PARC)         | 108    | -0.32 | -0.04   | -0.02   | 0.01    | 2.55  | 0.03  | 0.27    | 0.2892               |
|                      | Researcher                  | 50     | -1.5  | -0.03   | -0.02   | -0.01   | 4.51  | 0.06  | 0.68    | 0.1514               |
|                      | Cleaning service            | 29     | -0.65 | -0.03   | -0.02   | 0.03    | 1.72  | 0.09  | 0.41    | 0.2414               |
|                      | Transport service           | 14     | -0.39 | -0.04   | -0.01   | 0.02    | 2.22  | 0.13  | 0.62    | 0.4359 <sup>b</sup>  |
|                      | Staff                       | 188    | -0.4  | -0.04   | -0.02   | -0.01   | 0.98  | 0     | 0.15    | 0.0026               |
|                      | Student                     | 20     | -0.19 | -0.03   | -0.02   | -0.01   | 0.21  | -0.02 | 0.08    | 0.3705 <sup>b</sup>  |
|                      | Laboratory technician       | 31     | -0.17 | -0.03   | -0.01   | -0.01   | 0.51  | 0.02  | 0.15    | 0.3243               |
| Radiology technician | 31                          | -0.18  | -0.03 | -0.02   | 0.01    | 1.01    | 0.04  | 0.22  | 0.4002  |                      |
| Site                 | Other <sup>c</sup>          | 21     | -0.19 | -0.04   | -0.02   | -0.01   | 2.22  | 0.08  | 0.49    | 0.2080               |
|                      | Casa di Cura Cellini        | 51     | -0.17 | -0.05   | -0.03   | -0.01   | 1.27  | 0.01  | 0.22    | 0.0111               |
|                      | Clinica Fornaca di Sessant  | 47     | -0.4  | -0.05   | -0.03   | 0       | 0.53  | 0     | 0.15    | 0.0833               |
|                      | Humanitas Castelli          | 87     | -0.28 | -0.04   | 0.02    | 0.21    | 3.11  | 0.24  | 0.62    | 4.7 E-05             |
|                      | Humanitas Gavazzeni         | 313    | -0.88 | -0.04   | -0.01   | 0.15    | 10.37 | 0.13  | 0.68    | 0.0001               |
|                      | Humanitas Gradenigo         | 109    | -2.49 | -0.04   | -0.02   | -0.01   | 0.67  | -0.01 | 0.27    | 0.0586               |
|                      | Humanitas Mater Domini      | 105    | -0.17 | -0.03   | -0.02   | -0.01   | 0.63  | 0     | 0.1     | 0.3412               |
|                      | Humanitas Medical Care      | 23     | -0.19 | -0.04   | -0.02   | -0.01   | 0.02  | -0.03 | 0.04    | 0.0969               |
|                      | Humanitas Rozzano           | 667    | -3.39 | -0.04   | -0.02   | 0       | 16.32 | 0.04  | 0.7     | 0.0338               |
|                      | Humanitas San Pio X         | 98     | -0.68 | -0.03   | -0.02   | 0       | 2.39  | 0.04  | 0.29    | 0.2968               |
| Humanitas University | 32                          | -0.2   | -0.04 | -0.02   | -0.01   | 0.19    | -0.03 | 0.08  | 0.0590  |                      |

<sup>a</sup> = Wilcoxon-Mann-Whitney test

<sup>b</sup> = Some subjects did not indicate their BMI

<sup>c</sup> = Refers to volunteers and other professionals that operate in several structures

<sup>d</sup> = Minority class is less or equal to 20 (Wilcoxon-Mann-Whitney test is not reliable)

292  
293  
294  
295

296 Table 2. Antibody rates according to symptoms.

297

|                                                 |                            | counts | min   | 25 perc | 50 perc | 75 perc | max   | mean  | St. Dev. | p_value <sup>a</sup> |         |
|-------------------------------------------------|----------------------------|--------|-------|---------|---------|---------|-------|-------|----------|----------------------|---------|
| Class symptoms phase 1 (subjects with IgG ≥ 12) | Asymptomatic               | 91     | -1.5  | -0.13   | -0.05   | 0.09    | 2.39  | 0.04  | 0.5      | 0.00003              |         |
|                                                 | Paucisymptomatic           | 203    | -3.39 | -0.08   | 0.02    | 0.21    | 4.51  | 0.14  | 0.56     | 0.32865              |         |
|                                                 | Symptomatic                | 319    | -2.49 | -0.06   | 0.07    | 0.28    | 16.32 | 0.24  | 1.16     | 0.00057              |         |
| Symptoms phase 1 (subjects with IgG ≥ 12)       | Fever                      | No     | 350   | -3.39   | -0.09   | 0.01    | 0.21  | 4.51  | 0.13     | 0.02725              | 0.02725 |
|                                                 |                            | Yes    | 263   | -2.49   | -0.06   | 0.05    | 0.25  | 16.32 | 0.24     |                      |         |
|                                                 | Low-grade fever            | No     | 481   | -3.39   | -0.08   | 0.02    | 0.23  | 16.32 | 0.19     | 0.17265              | 0.17265 |
|                                                 |                            | Yes    | 132   | -0.39   | -0.07   | 0.05    | 0.26  | 2.55  | 0.14     |                      |         |
|                                                 | Cough                      | No     | 372   | -3.39   | -0.08   | 0.01    | 0.19  | 16.32 | 0.14     | 0.01120              | 0.01120 |
|                                                 |                            | Yes    | 241   | -2.49   | -0.07   | 0.07    | 0.31  | 10.37 | 0.24     |                      |         |
|                                                 | Sore throat                | No     | 353   | -3.39   | -0.09   | 0.02    | 0.23  | 16.32 | 0.19     | 0.08309              | 0.08309 |
|                                                 |                            | Yes    | 260   | -2.49   | -0.07   | 0.04    | 0.25  | 4.51  | 0.16     |                      |         |
|                                                 | Muscle pain                | No     | 299   | -1.5    | -0.1    | 0       | 0.2   | 4.51  | 0.13     | 0.00763              | 0.00763 |
|                                                 |                            | Yes    | 314   | -3.39   | -0.06   | 0.06    | 0.27  | 16.32 | 0.22     |                      |         |
|                                                 | Asthenia                   | No     | 341   | -3.39   | -0.1    | 0       | 0.21  | 16.32 | 0.17     | 0.00574              | 0.00574 |
|                                                 |                            | Yes    | 272   | -2.49   | -0.06   | 0.07    | 0.25  | 10.37 | 0.19     |                      |         |
|                                                 | Anosmia / dysgeusia        | No     | 313   | -3.39   | -0.12   | -0.01   | 0.2   | 16.32 | 0.14     | 0.00006              | 0.00006 |
|                                                 |                            | Yes    | 300   | -0.86   | -0.05   | 0.06    | 0.28  | 10.37 | 0.22     |                      |         |
|                                                 | Gastrointestinal disorders | No     | 403   | -3.39   | -0.08   | 0.03    | 0.21  | 10.37 | 0.17     | 0.46477              | 0.46477 |
|                                                 |                            | Yes    | 210   | -2.49   | -0.08   | 0.02    | 0.25  | 16.32 | 0.19     |                      |         |
|                                                 | Conjunctivitis             | No     | 517   | -3.39   | -0.08   | 0.02    | 0.21  | 16.32 | 0.18     | 0.16050              | 0.16050 |
|                                                 |                            | Yes    | 96    | -2.49   | -0.07   | 0.04    | 0.32  | 1.72  | 0.14     |                      |         |
|                                                 | Dyspnea                    | No     | 493   | -3.39   | -0.08   | 0.02    | 0.23  | 16.32 | 0.16     | 0.34700              | 0.34700 |
|                                                 |                            | Yes    | 120   | -2.49   | -0.07   | 0.05    | 0.26  | 10.37 | 0.24     |                      |         |
|                                                 | Chest pain                 | No     | 502   | -3.39   | -0.08   | 0.01    | 0.24  | 10.37 | 0.15     | 0.08088              | 0.08088 |
|                                                 |                            | Yes    | 111   | -0.39   | -0.04   | 0.07    | 0.22  | 16.32 | 0.3      |                      |         |
|                                                 | Tachycardia                | No     | 512   | -3.39   | -0.08   | 0.01    | 0.21  | 4.51  | 0.13     | 0.02353              | 0.02353 |
|                                                 |                            | Yes    | 101   | -2.49   | -0.06   | 0.08    | 0.32  | 16.32 | 0.4      |                      |         |
| Pneumonia                                       | No                         | 568    | -3.39 | -0.08   | 0.02    | 0.22    | 16.32 | 0.15  | 0.18692  | 0.18692              |         |
|                                                 | Yes                        | 45     | -0.88 | -0.06   | 0.06    | 0.38    | 10.37 | 0.51  | 1.69     |                      |         |

<sup>a</sup> = Wilcoxon-Mann-Whitney test

298  
299  
300  
301  
302  
303  
304  
305  
306  
307  
308  
309  
310  
311

312 Table 3. Chi-squared analysis of groups < 10<sup>th</sup> percentile and > 90<sup>th</sup> percentile.

|                                                                                                |                             | < 10 perc | > 90 perc | p_value             |
|------------------------------------------------------------------------------------------------|-----------------------------|-----------|-----------|---------------------|
| Sex                                                                                            | F                           | 321       | 340       | 0.0627              |
|                                                                                                | M                           | 133       | 105       |                     |
| Age                                                                                            | 21-30                       | 93        | 83        | 0.5429              |
|                                                                                                | 31-40                       | 108       | 94        | 0.3804              |
|                                                                                                | 41-50                       | 121       | 142       | 0.0970              |
|                                                                                                | 51-60                       | 88        | 98        | 0.3711              |
|                                                                                                | 60+                         | 44        | 28        | 0.0793              |
| BMI <sup>a</sup>                                                                               | 18.5 ≤ BMI < 25             | 267       | 255       | 0.6963              |
|                                                                                                | BMI ≥ 30                    | 58        | 72        | 0.1750              |
|                                                                                                | 25 ≤ BMI < 30               | 106       | 93        | 0.4214              |
|                                                                                                | BMI < 18.5                  | 23        | 25        | 0.8261              |
| Role                                                                                           | Other <sup>b</sup>          | 63        | 37        | 0.0109              |
|                                                                                                | Anesthesiologist            | 6         | 7         | 0.9701              |
|                                                                                                | Biologist                   | 5         | 2         | 0.4640              |
|                                                                                                | Surgeon                     | 25        | 21        | 0.7007              |
|                                                                                                | Physiotherapist             | 6         | 7         | 0.9710              |
|                                                                                                | Nurse                       | 113       | 132       | 0.1255              |
|                                                                                                | Physician                   | 56        | 61        | 0.6082              |
|                                                                                                | Healthcare Partner Operator | 38        | 64        | 0.0062              |
|                                                                                                | Front office (PARC)         | 31        | 28        | 0.8494              |
|                                                                                                | Researcher                  | 13        | 9         | 0.5485              |
|                                                                                                | Cleaning service            | 7         | 9         | 0.7698              |
|                                                                                                | Transport Service           | 5         | 5         | 0.7747 <sup>c</sup> |
|                                                                                                | Staff                       | 69        | 44        | 0.0214              |
|                                                                                                | Student                     | 5         | 4         | 0.9759 <sup>c</sup> |
|                                                                                                | Laboratory Technician       | 6         | 7         | 0.9701              |
| Radiology Technician                                                                           | 6                           | 8         | 0.7587    |                     |
| Site                                                                                           | Other <sup>b</sup>          | 6         | 3         | 0.5223 <sup>c</sup> |
|                                                                                                | Casa di Cura Cellini        | 19        | 8         | 0.0573              |
|                                                                                                | Clinica Fornaca di Sessant  | 18        | 12        | 0.3828              |
|                                                                                                | Humanitas Castelli          | 23        | 47        | 0.0032              |
|                                                                                                | Humanitas Gavazzeni         | 97        | 142       | 0.0005              |
|                                                                                                | Humanitas Gradenigo         | 36        | 22        | 0.0918              |
|                                                                                                | Humanitas Mater Domini      | 20        | 23        | 0.7041              |
|                                                                                                | Humanitas Medical Care      | 8         | 3         | 0.2379 <sup>c</sup> |
|                                                                                                | Humanitas Rozzano           | 190       | 160       | 0.0806              |
|                                                                                                | Humanitas San Pio X         | 27        | 21        | 0.5025              |
|                                                                                                | Humanitas University        | 10        | 4         | 0.1905 <sup>c</sup> |
| <sup>a</sup> = Some subjects did not indicate their BMI                                        |                             |           |           |                     |
| <sup>b</sup> = Refers to volunteers and other professionals that operate in several structures |                             |           |           |                     |
| <sup>c</sup> = Minority class is less or equal to 5 (chi-square test is not reliable)          |                             |           |           |                     |

313  
314

315 Table 4. Chi-squared analysis of groups < 10<sup>th</sup> percentile and > 90<sup>th</sup> percentile per symptoms.

|                                     |                                        |     | <10perc | >90perc             | p_value             | %Yes<10perc <sup>a</sup> | %Yes>90perc <sup>a</sup> |
|-------------------------------------|----------------------------------------|-----|---------|---------------------|---------------------|--------------------------|--------------------------|
| Symptoms                            | Fever                                  | No  | 360     | 284                 | 3.9E-07             | 37                       | 63                       |
|                                     |                                        | Yes | 94      | 161                 |                     |                          |                          |
|                                     | Low-grade fever                        | No  | 388     | 359                 | 0.0678              | 43                       | 57                       |
|                                     |                                        | Yes | 66      | 86                  |                     |                          |                          |
|                                     | Cough                                  | No  | 335     | 284                 | 0.0016              | 43                       | 58                       |
|                                     |                                        | Yes | 119     | 161                 |                     |                          |                          |
|                                     | Sore throat                            | No  | 302     | 271                 | 0.0923              | 47                       | 53                       |
|                                     |                                        | Yes | 152     | 174                 |                     |                          |                          |
|                                     | Muscle pain                            | No  | 310     | 246                 | 0.0001              | 42                       | 58                       |
|                                     |                                        | Yes | 144     | 199                 |                     |                          |                          |
|                                     | Asthenia                               | No  | 340     | 268                 | 3.7E-06             | 39                       | 61                       |
|                                     |                                        | Yes | 114     | 177                 |                     |                          |                          |
|                                     | Anosmia/dysgeusia                      | No  | 364     | 247                 | 4.0E-15             | 31                       | 69                       |
|                                     |                                        | Yes | 90      | 198                 |                     |                          |                          |
|                                     | Gastrointestinal disorders             | No  | 336     | 313                 | 0.2485              | 47                       | 53                       |
|                                     |                                        | Yes | 118     | 132                 |                     |                          |                          |
|                                     | Conjunctivitis                         | No  | 400     | 382                 | 0.3633              | 46                       | 54                       |
|                                     |                                        | Yes | 54      | 63                  |                     |                          |                          |
|                                     | Dyspnea                                | No  | 405     | 375                 | 0.0370              | 41                       | 59                       |
|                                     |                                        | Yes | 49      | 70                  |                     |                          |                          |
| Chest pain                          | No                                     | 415 | 367     | 0.0001              | 33                  | 67                       |                          |
|                                     | Yes                                    | 39  | 78      |                     |                     |                          |                          |
| Tachycardia                         | No                                     | 406 | 371     | 0.0107              | 39                  | 61                       |                          |
|                                     | Yes                                    | 48  | 74      |                     |                     |                          |                          |
| Pneumonia                           | No                                     | 440 | 420     | 0.0889              | 36                  | 64                       |                          |
|                                     | Yes                                    | 14  | 25      |                     |                     |                          |                          |
| Total of Symptoms in phase I        | Asymptomatic                           | 150 | 80      | 3.4E-07             | 65                  | 35                       |                          |
|                                     | Paucisymptomatic                       | 179 | 158     | 0.2520              | 53                  | 47                       |                          |
|                                     | Symptomatic                            | 125 | 207     | 5.6E-09             | 38                  | 62                       |                          |
| Comorbidities                       | Chronic Obstructive Bronchopneumopathy | No  | 451     | 444                 | 0.6305 <sup>b</sup> |                          |                          |
|                                     |                                        | Yes | 3       | 1                   |                     |                          |                          |
|                                     | Asthma                                 | No  | 430     | 412                 | 0.2408              |                          |                          |
|                                     |                                        | Yes | 24      | 33                  |                     |                          |                          |
|                                     | Dyslipidemia                           | No  | 413     | 404                 | 0.9834              |                          |                          |
|                                     |                                        | Yes | 41      | 41                  |                     |                          |                          |
|                                     | Past Neoplasia                         | No  | 431     | 438                 | 0.0063              |                          |                          |
|                                     |                                        | Yes | 23      | 7                   |                     |                          |                          |
|                                     | Hypertension                           | No  | 401     | 409                 | 0.0915              |                          |                          |
|                                     |                                        | Yes | 53      | 36                  |                     |                          |                          |
|                                     | Past Coronaropathies                   | No  | 454     | 443                 | 0.4702 <sup>b</sup> |                          |                          |
|                                     |                                        | Yes | 0       | 2                   |                     |                          |                          |
|                                     | Atrial Fibrillation                    | No  | 450     | 441                 | 0.7439 <sup>b</sup> |                          |                          |
|                                     |                                        | Yes | 4       | 4                   |                     |                          |                          |
|                                     | Past Stroke/ TIA                       | No  | 452     | 445                 | 0.4878 <sup>b</sup> |                          |                          |
|                                     |                                        | Yes | 2       | 0                   |                     |                          |                          |
|                                     | Steatosis/Cyrrosis                     | No  | 448     | 444                 | 0.1359 <sup>b</sup> |                          |                          |
|                                     |                                        | Yes | 6       | 1                   |                     |                          |                          |
|                                     | Chronic kidney failure                 | No  | 453     | 445                 | 0.9920 <sup>b</sup> |                          |                          |
|                                     |                                        | Yes | 1       | 0                   |                     |                          |                          |
| Other liver diseases                | No                                     | 452 | 441     | 0.6641 <sup>b</sup> |                     |                          |                          |
|                                     | Yes                                    | 2   | 4       |                     |                     |                          |                          |
| Rheumatological diseases            | No                                     | 445 | 431     | 0.3715              |                     |                          |                          |
|                                     | Yes                                    | 9   | 14      |                     |                     |                          |                          |
| Other diseases of the immune system | No                                     | 418 | 409     | 0.9726              |                     |                          |                          |
|                                     | Yes                                    | 36  | 36      |                     |                     |                          |                          |
| Diabetes mellitus                   | No                                     | 452 | 443     | 0.6305 <sup>b</sup> |                     |                          |                          |
|                                     | Yes                                    | 2   | 2       |                     |                     |                          |                          |
| Gotta                               | No                                     | 452 | 445     | 0.4878 <sup>b</sup> |                     |                          |                          |
|                                     | Yes                                    | 2   | 0       |                     |                     |                          |                          |

<sup>a</sup> = Percentage of subjects with symptoms (Yes) per rate class  
<sup>b</sup> = Minority class is less or equal to 5 (chi-square test is not reliable)

316  
317  
318

319 **Figure**

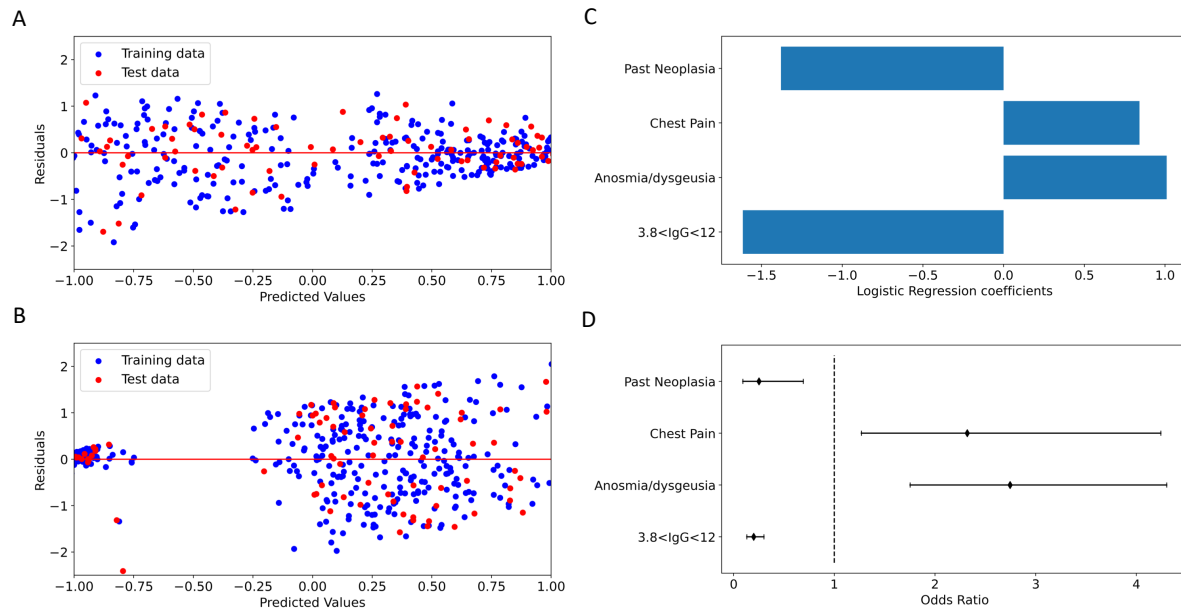

320  
321 **Figure 1:** **a**, Dataset < 10% percentile Regression Diagnostic plot of predicted values against  
322 residuals of training and test data; **b**, Dataset >90% percentile Regression Diagnostic plot of predicted  
323 values against residuals of training and test data; **c**, Barplot with Logistic Regression coefficients for  
324 most important features; **d**, Odds ratio of Logistic Regression with confidence intervals (95%) for the  
325 most important features.

326

327

328
